# **Maternal diet-induced obesity during pregnancy alters lipid supply to fetuses and changes the cardiac tissue lipidome in a sex-dependent manner**

**Lucas C. Pantaleão**<sup>1,3,5\*</sup>, **Isabella Inzani**<sup>1,3\*</sup>, Samuel Furse<sup>1</sup>, Elena Loche<sup>1</sup>, Antonia Hufnagel<sup>1</sup>, Thomas Ashmore<sup>1</sup>, Heather L. Blackmore<sup>1</sup>, Benjamin Jenkins<sup>1</sup>, Asha A. M. Carpenter<sup>1</sup>, Ania Wilczynska<sup>2</sup>, Martin Bushell<sup>2</sup>, Albert Koulman<sup>1</sup>, Denise S. Fernandez-Twinn<sup>1</sup>, Susan E. Ozanne<sup>1,4\*</sup>

1. University of Cambridge Metabolic Research Laboratories and MRC Metabolic Diseases Unit, Level 4, Addenbrooke's Hospital, Cambridge, Cambridgeshire, United Kingdom, CB22 0QQ.
2. CRUK Beatson Institute, Garscube Estate, Switchback Road, Bearsden, Glasgow, United Kingdom, G61 1BD
3. These authors contributed equally to this work
4. Senior author
5. Lead contact

\* Correspondence: lp435@medschl.cam.ac.uk, @carminattipantaleao (L.C.P.); ii233@cam.ac.uk (I.I.); seo10@cam.ac.uk, @ozannelab (S.E.O.)

1 **ABSTRACT**

2 Maternal obesity during pregnancy has immediate and long-term detrimental effects on the  
3 offspring heart. In this study, we characterized the cardiac and circulatory lipid profiles in  
4 fetuses of diet-induced obese pregnant mice and established the changes in lipid abundance and  
5 fetal cardiac transcriptomics. We used untargeted and targeted lipidomics and transcriptomics  
6 to define changes in the serum and cardiac lipid composition and fatty acid metabolism in male  
7 and female fetuses. From these analyses we observed: (1) maternal obesity affects the maternal  
8 and fetal serum lipidome distinctly; (2) female heart lipidomes are more sensitive to maternal  
9 obesity than male fetuses; (3) changes in lipid supply might contribute to early expression of  
10 lipolytic genes in mouse hearts exposed to maternal obesity. These results highlight the  
11 existence of sexually dimorphic responses of the fetal heart to the same *in utero* obesogenic  
12 environment and identify lipids species that might mediate programming of cardiovascular  
13 health.

14

15 **KEYWORDS**

16 Maternal obesity, Fetal heart, Heart metabolism, Lipidomics, Transcriptomics

## 17 **INTRODUCTION**

18 Mammalian heart development and maturation involve a complex array of processes that are  
19 only completed postnatally, when increased systemic demands and changes in substrate and  
20 oxygen availability promote major cardiac remodelling (Reviewed by Piquereau and Ventura-  
21 Clapier, 2018). Appropriate and regulated flow of hormones, nutrients, metabolites and  
22 absorbed gases into fetal tissues is required to ensure that intrauterine development is achieved  
23 in an appropriate time-sensitive manner. Therefore, adverse gestational conditions – such as  
24 maternal obesity – can disrupt maternal/fetal molecule interchange, leading to impaired fetal  
25 development, which can have long-term impacts on cardio-metabolic health postnatally (Dong  
26 *et al*, 2012; Zambrano and Nathanielsz, 2013). Such a causal link between maternal metabolic  
27 status and lifelong offspring health and disease is encompassed in what has been termed the  
28 Developmental Origins of Health and Disease (Barker, 2007).

29 Maternal obesity during gestation is one condition that has been shown to raise the risk of non-  
30 communicable diseases in the expectant mother and her children. Numerous studies in humans  
31 and animal models suggest that obesity during pregnancy has immediate and long-term  
32 detrimental effects including increased risk of congenital heart disease (Helle and Priest, 2020),  
33 and increased susceptibility of the offspring to cardiometabolic abnormalities postnatally  
34 (Guénard *et al.*, 2013, Loche *et al*, 2018). This is of particular importance, as recent data  
35 indicates that around 50% of pregnant women in developed countries are currently either  
36 overweight or obese, and cardiovascular diseases are a leading cause of death worldwide  
37 (NMPA Project Team, 2019; GBD, 2017).

38 Mild hypoxia, high maternal insulin and leptin levels, as well as changes in nutrient and  
39 metabolite availability have been implicated as causal factors, mediating the effects of maternal  
40 obesity on the fetus and its long-term health (Howell and Powell, 2017). However, there is  
41 limited data in relation to the molecular consequences of such exposure on the fetal heart.

42 Although a small number of studies have provided some evidence that maternal obesity affects  
43 the fetal cardiac transcriptome and protein profile, these studies do not explain the whole  
44 complexity of changes in the cardiac phenotype. In addition, there is very limited data on the  
45 contribution of the maternal and fetal lipidome to programming mechanisms (Catalano and  
46 Shankar, 2017).

47 Lipids are a complex group of structural, energy and signalling molecules involved in a variety  
48 of physiological, metabolic and pathological processes. Changes in the murine heart lipidome  
49 have been shown to initiate and promote inflammatory reactions after infarction (Halade *et al*,  
50 2017), and cellular lipid composition has been associated with the distinction between  
51 physiological and pathological cardiac hypertrophy and with prognosis of cardiac disease  
52 (Tham *et al*, 2018, Le *et al*, 2014). Moreover, recent studies explored the association of the  
53 cardiac lipidome with life stage progression, showing how changes in intracellular lipids  
54 contribute to heart maturation at birth (Walejko *et al*, 2018) and the impact of ageing on the  
55 heart (Eum *et al*, 2020).

56 Despite the growing interest in lipid profiling in health and disease, the study of fetal cardiac  
57 lipids in maternal obesity models remains largely unexplored. The aim of the current study was  
58 therefore to use lipidomics and cardiac transcriptomics to identify lipid pathways that may be  
59 associated with developmental phenotypes that lead to chronic diseases later in life. In addition,  
60 given the growing evidence for sex-specific differences in the programming field, a further aim  
61 was to establish if any of the responses were sexually dimorphic. As circulating lipids are often  
62 used as biomarkers of cardiovascular health, we also sought to investigate associations between  
63 maternal and fetal serum lipidomes.

64 **RESULTS**

65 ***Maternal obesity affects female, but not male, mouse offspring heart morphology***

66 A well-established diet-induced maternal obesity model in which the female mouse develops  
67 obesity and gestational diabetes was used to investigate the effects of maternal obesity on the  
68 offspring heart. At gestational day 18.5, male and female fetuses from obese dams were smaller  
69 than controls (Figure 1A), and although their heart weights were not significantly different from  
70 control hearts in either absolute or relative terms (Figure 1B, 1C), obese female, but not male,  
71 fetal cardiomyocytes were smaller, as observed by the increased number of nuclei detected per  
72 histological section area (Figure 1D).

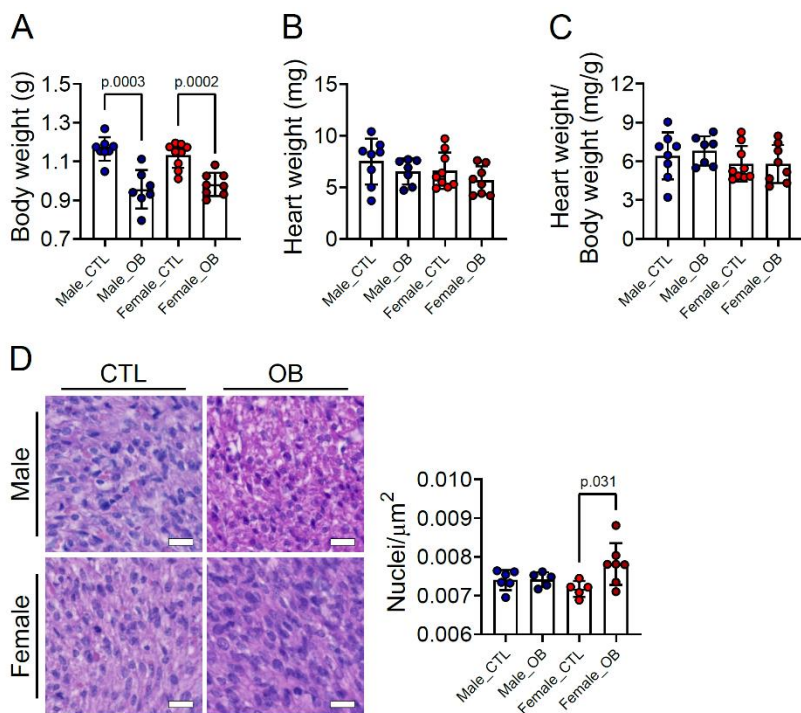

**Figure 1. Fetal characteristics at gestational day 18.5.** (A) Body weight of male and female fetuses from healthy control (CTL) and obese (OB) mouse dams at gestational day 18.5. (B-C) Heart weight and heart weight/body weight ratio of male and female fetuses from CTL and OB dams at gestational day 18.5. Male CTL n=8, male OB n=7, female CTL n=9, female OB n=8. (D) Representative images and quantification of cell nuclei count per  $\mu\text{m}^2$ . Histological sections stained with haematoxylin and eosin of male and female fetuses from CTL and OB dams at gestational day 18.5. Male CTL n=6, male OB n=6, female CTL n=5, female OB n=7. Scale bar indicates 20  $\mu\text{m}$ . p-value calculated by Student t-test.

73 ***Maternal obesity drives changes to the lipid composition of maternal and fetal serum***

74 Maternal and fetal serum lipidomes were obtained by direct infusion high-resolution mass  
75 spectrometry, a rapid method used to profile the lipids in an organic extract. Full data and  
76 annotation of isobaric signals are available in the supplementary information (Supplementary  
77 file 1, Figure 2–source Data 1). We used Principal Component Analysis (PCA) to identify  
78 orthogonal distance and relatedness amongst individual fetal and maternal serum lipidomes.

79 This multivariate analysis demonstrated that there was a clear distinction between maternal and  
80 fetal serum lipid profiles, regardless of the maternal nutritional status or offspring sex (Figure  
81 2–figure supplement 1A). In order to test the hypothesis that the lipid composition in the serum  
82 of the dams and her male and female fetuses differed between control and obese mothers, PCAs  
83 of just these pairs of groups were performed. These suggested that there was clear segregation  
84 in each case driven by maternal dietary status (Figure 2–figure supplement 1B, C, D).

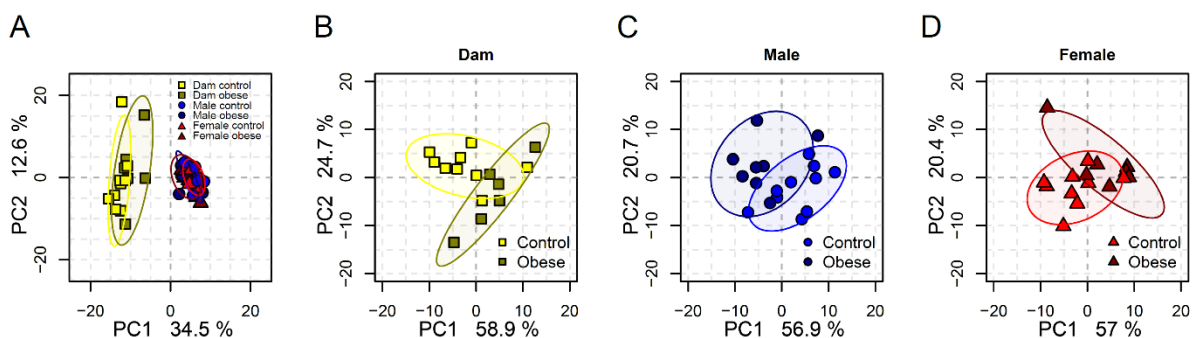

**Figure 2–figure supplement 1.** (A) PCA plots showing the PC1 and PC2 scores for individual dam and fetal serum lipidomes at gestational day 18.5. (B–D) PCA plots showing the PC1 and PC2 scores for individual dam (B), male (C) and female fetal (D) serum lipidomes.

85 In order to identify the lipid pathways altered, we summed the abundance of the lipid variables  
86 in each lipid class (head group, assuming even chain length for the fatty acid, see supplementary  
87 files 1 and 2 for lipid signals used for each class) and calculated which classes differed in  
88 abundance according to maternal status. This showed that cholesteryl esters, ceramides, and  
89 sphingomyelins were more abundant in serum from obese dams than in serum from controls  
90 (Figure 2A). Amongst fetal serum, we observed changes to the abundance of lipid classes that  
91 were generally similar between males and females, though different classes reached statistical  
92 significance in males (triglycerides, phosphatidic acids and the ratio of triglycerides to  
93 phospholipids) (Figure 2B) and females (phosphatidylcholines/phosphatidylethanolamines,  
94 phosphatidic acids and ceramides) (Figure 2C). We then used factorial analysis to show that the  
95 abundance of triglycerides, phosphatidylcholines/phosphatidylethanolamines and ceramides  
96 were all significantly regulated by maternal diet (Figure 2D). We also observed sex differences

97 in cholesteryl esters, with males showing higher relative abundance compared to females  
98 (Figure 2D, see also Figure 2–figure supplement 2A).

99

### 100 *Specific lipid profiles differ between maternal and fetal serum*

101 Lipid classes consist of several lipid isoforms that comprise different fatty acid residues. To  
102 assess the differences in lipids at the individual level, we used both univariate and multivariate  
103 models to identify differences between serum from obese and control dams and their fetuses.  
104 Although ceramides were more abundant at the class level in obese dam serum, no ceramide  
105 isoform was statistically significantly different between groups (Figure 2E, 2F). At the  
106 individual isoform level, campesterol (ST 28:1;O) and many unsaturated triglycerides were less  
107 abundant. Similar to changes observed at the class level, the abundance of two isoforms of  
108 sphingomyelin, and several individual cholesteryl esters, was also increased in the sera of obese  
109 mothers. Some phosphatidylcholines/odd chain phosphatidylethanolamines were more  
110 abundant, although two – PC 40:5/PE 43:5 and PC 38:5/PE 41:5 – and *lyso*-phosphatidylcholine  
111 (LPC) 22:5 were less abundant.

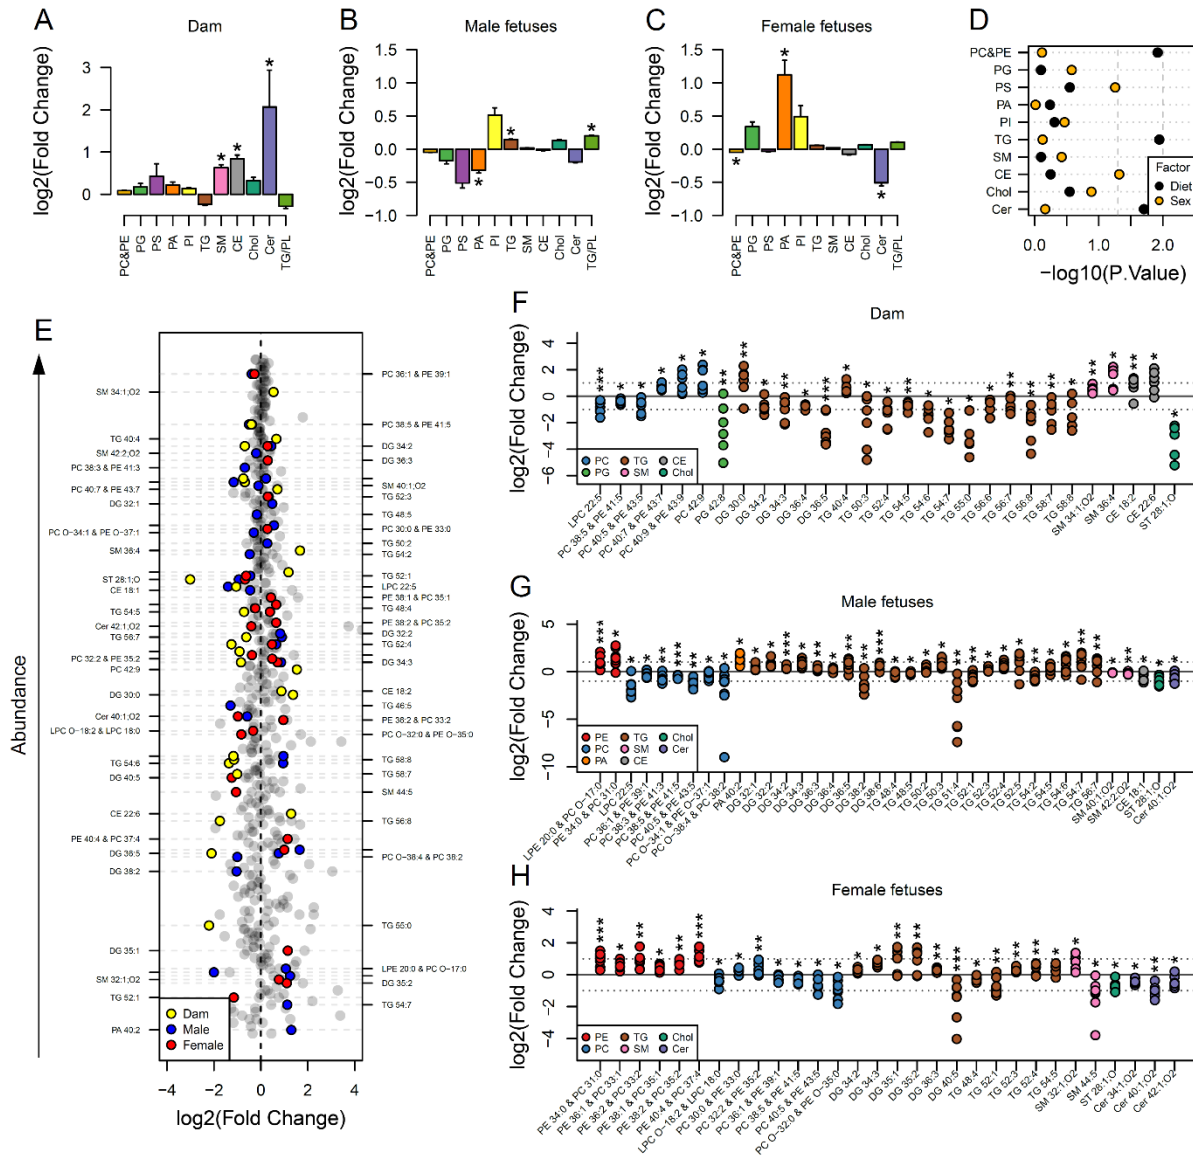

**Figure 2. Maternal and fetal serum lipidome measured by direct infusion mass spectrometry.** (A-C) Relative changes in serum lipid classes abundance in obese dams (A), male (B) and female (C) obese fetuses. Values are mean + SE. \* $p < 0.05$  calculated by Student t-test or Mann-Whitney test. (D) Influence of maternal diet and sex on fetal serum lipid classes abundance as calculated by factorial ANOVA. (E) Regulation of maternal and fetal serum lipid species ranked according to their abundance. Coloured dots represent statistically regulated species as calculated by univariate Student t-test ( $p < 0.05$ ) and PLS-DA VIP (vip score  $> 1$ ) in maternal or fetal OB serum compared to CTL. (F-H) Serum levels of regulated lipids from obese dams (F) and from male (G) and female (H) fetuses of obese dams at gestational day 18.5. Each dot represents a result from one obese heart, relative to the average of results for individual lipids in the control group (straight line). Dam CTL  $n = 9$ , dam OB  $n = 6$ , male fetuses CTL  $n = 10$ , male fetuses OB  $n = 8$ , female fetuses CTL  $n = 10$ , female fetuses OB  $n = 7$ ; \*  $p < 0.05$ , \*\*  $p < 0.01$ , \*\*\*  $p < 0.001$  calculated by Student t-test. In figures A-D: PE, phosphatidylethanolamines/odd chain phosphatidylcholines; PC, phosphatidylcholines/odd-chain phosphatidylethanolamines; PG, phosphatidylglycerols; PS, phosphatidylserines; PA, phosphatidic acids; PI, phosphatidylinositols; TG, monoglycerides, diglycerides and triglycerides; SM, sphingomyelins; CE, cholesteryl esters; Cer, ceramides; PL, phospholipids. In figures E-H, other isobaric lipids can contribute to these signals (Supplementary file 1). See also Figure 2–figure supplement 1 and Figure 2–figure supplement 2. Full data is available in Figure 2–source Data 1.

112 We then explored if a subset of lipids was transported from the maternal to the fetal circulation  
 113 using linear regression. We showed that only a few maternal phospholipids and *lyso-*



114 phospholipids species – comprising LPC 18:2, 20:4, 22:5 and 22:6 – and campesterol were  
 115 significantly correlated with the same species in both male and female fetal serum (Figure 2–  
 116 figure supplement 2B, 2C). Contrasting to the signature observed in dam serum, naturally  
 117 highly abundant triglyceride isoforms had increased abundance in both male and female fetuses  
 118 with only a handful of exceptions (e.g., TG 54:2 and TG 48:5 in males).  
 119 Phosphatidylethanolamine/odd chain phosphatidylcholines isoforms were also more abundant  
 120 in both males and females, with females showing increased abundance of the greatest number  
 121 of species, and PE 34:0/PC 31:0 being regulated in a sex-independent manner (Figure 2E, 2G,  
 122 2H). Odd chain fatty acid containing phosphatidylcholines are isobaric with  
 123 phosphatidylethanolamines (see supplementary file 2), however no other evidence from other  
 124 lipid classes suggested a change in odd chain fatty acid metabolism. Consistent with the dam  
 125 serum data, several phosphatidylcholine/odd chain phosphatidylethanolamines isoforms were  
 126 less abundant in male and female fetuses.

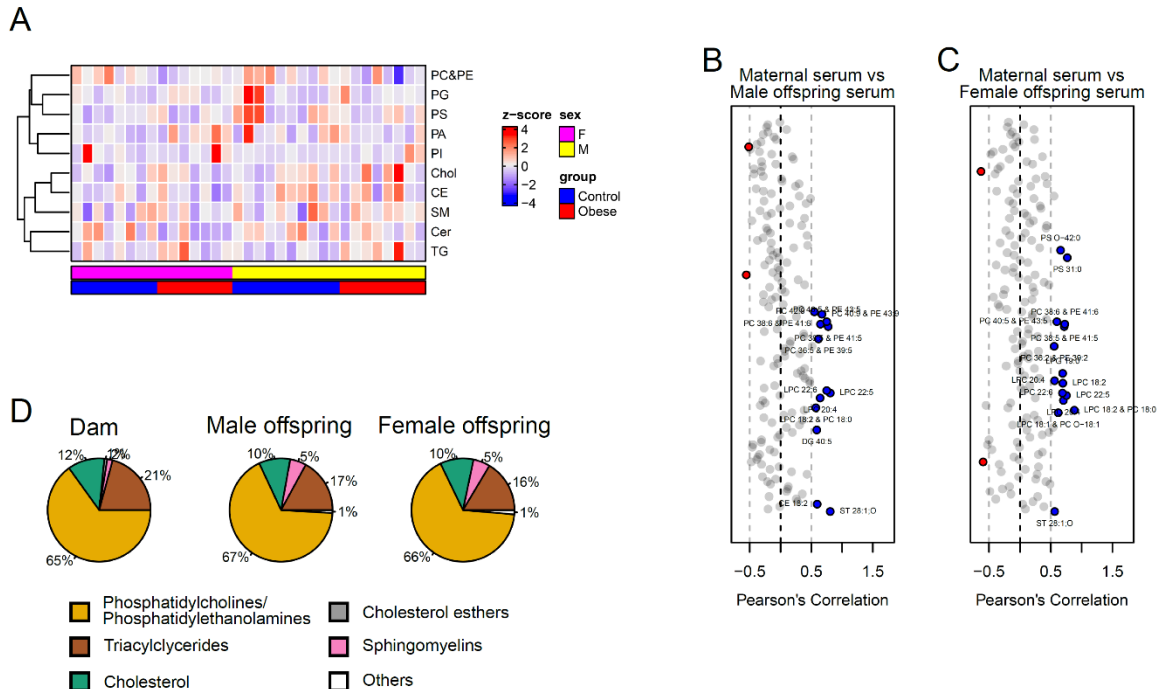

**Figure 2-figure supplement 2.** (A) Heatmap showing lipid classes serum levels in male and female E18.5 fetuses. (B-C) Pearson's correlation between individual lipid species in maternal serum and male (B) and female (C) fetal serum at gestational day 18.5. Blue dots represent positively correlated lipid species between maternal and fetal serum deemed statistically significant (p < 0.05). Red dots represent negatively correlated lipid species between maternal and fetal serum deemed statistically significant (p < 0.05). (D) Relative amount of different lipid classes in maternal and fetal serum.

127 **Maternal obesity is associated with the fatty acid composition of phospholipids in maternal**  
128 **and fetal serum**

129 The bulk of the total of serum lipid species detected were glycerides, phospholipids and  
130 cholesterol (Figure 2–figure supplement 2D), with glycerides, phospholipids and *lyso*-  
131 phospholipids comprising three and two fatty acids respectively, that are covalently bound to  
132 glycerol. As we observed differences in the abundance of individual lipid isoforms in maternal  
133 and fetal serum, we sought to elucidate whether the distinct signatures observed in fetuses from  
134 obese dams would also translate into an imbalance in the distribution of fatty acid residues in  
135 phospholipids. When clustered according to the number of double bonds as either saturated,  
136 monounsaturated or polyunsaturated residues, we saw that the relative abundances of these  
137 were not significantly affected by maternal diet either in maternal or fetal serum (Figure 3A).  
138 We also noted that fatty acids from phospholipids with a chain length shorter than 18 carbons  
139 were generally more abundant in obese serum, whereas the abundance of longer molecules  
140 tended to be lower (Figure 3B).

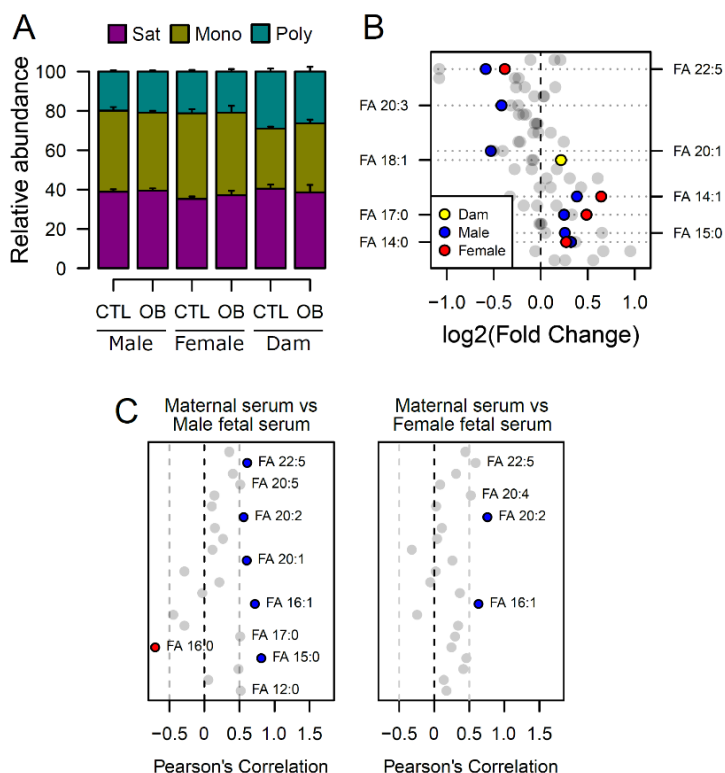

**Figure 3. Fatty acid composition of serum phospholipids measured by direct infusion mass spectrometry using in-source CID fragmentation.**

(A) Grouped saturated, monounsaturated and polyunsaturated fatty acids content in maternal, male and female fetal serum at gestational day 18.5. Values are mean + SE. (B) Regulation of maternal and fetal serum fatty acids. Coloured dots represent statistically regulated fatty acids as calculated by univariate Student t-test or Mann-Whitney test ( $p < 0.05$ ) in maternal or fetal OB serum compared to CTL. (C) Pearson's correlation between maternal serum fatty acids and the same fatty acids detected in the fetal serum. Blue and red dots represent species with significant positive and negative association ( $p < 0.05$ ). Dam CTL  $n = 8$ , dam OB  $n = 6$ , male fetuses CTL  $n = 10$ , male fetuses OB  $n = 8$ , female fetuses CTL  $n = 8$ , female fetuses OB  $n = 6$ . See also Figure 3–figure supplement 1 and Figure 3–figure supplement 2. Full data is available in Figure 3–source Data 1

141 At the individual level, we again identified a distinction between maternal and fetal serum  
142 profiles, with phospholipid fatty acid residues being differentially regulated (Figure 3B, see  
143 also Figure 3–figure supplement 1).

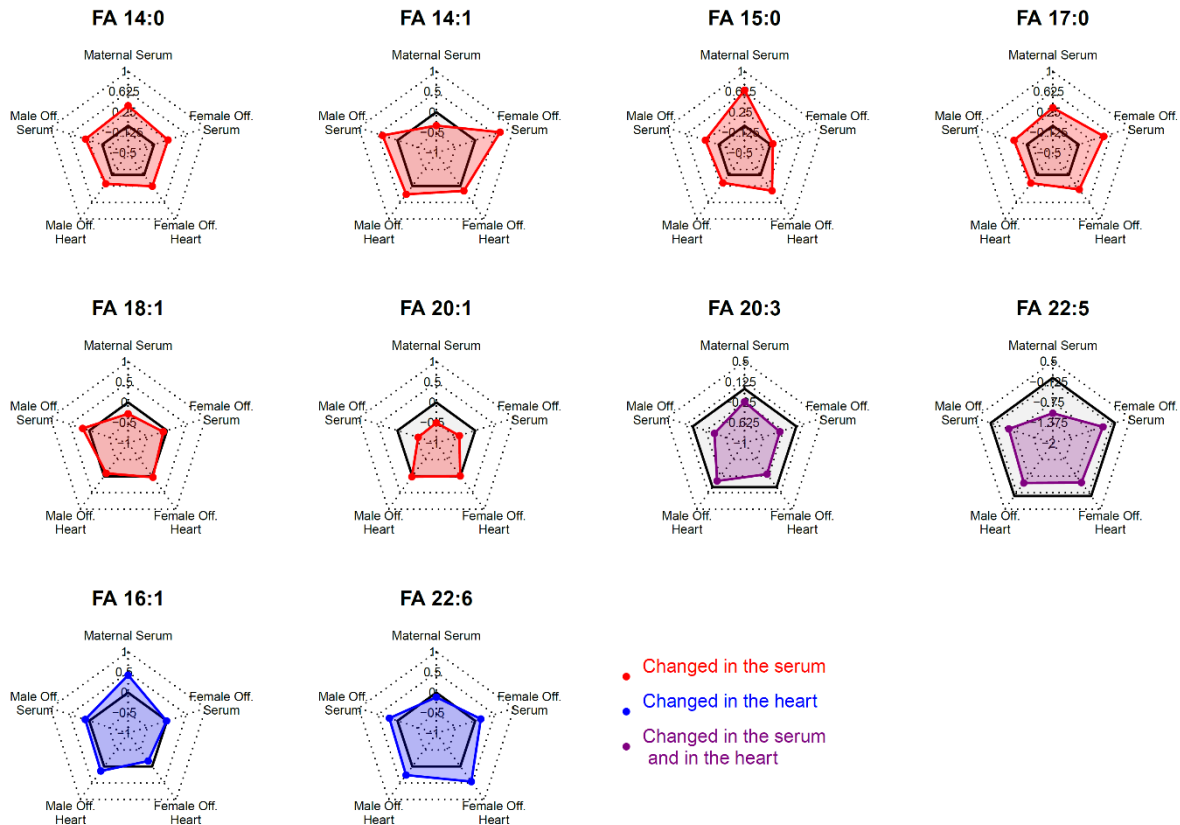

**Figure 3–figure supplement 1.** Radar plots showing log<sub>2</sub> of fold change of fatty acids statistically changed in the serum or in the heart of fetuses from obese dams in different compartments. Grey shaded area indicates log<sub>2</sub> fold change smaller than 0.

144 In line with the lower polyunsaturated phospholipid levels, those containing n-3  
145 docosapentaenoic acid (DPA) (22:5) were less abundant, and those with saturated fatty acids  
146 myristic (14:0) and margaric (17:0), and monounsaturated myristoleic acid (14:1) were more  
147 abundant in the fetal sera of both sexes in response to maternal obesity. In contrast, oleic acid  
148 (18:1) from phospholipids was more abundant in the serum of obese dams only. Despite the  
149 differences observed, the fetal levels of a few residues were significantly correlated with the  
150 maternal ones, and an overall trend for positive correlation between fatty acids levels in  
151 maternal and fetal sera was observed (Figure 3C). By generating correlation matrices with  
152 group independent variables using Euclidian clustering, we also observed that several saturated

153 and monounsaturated fatty acid residues were positively correlated and tended to cluster  
154 together (Figure 3–figure supplement 2). Similarly, polyunsaturated fatty acids established  
155 clusters and were positively correlated. Several saturated and monounsaturated fatty acids were  
156 negatively correlated to polyunsaturated species.

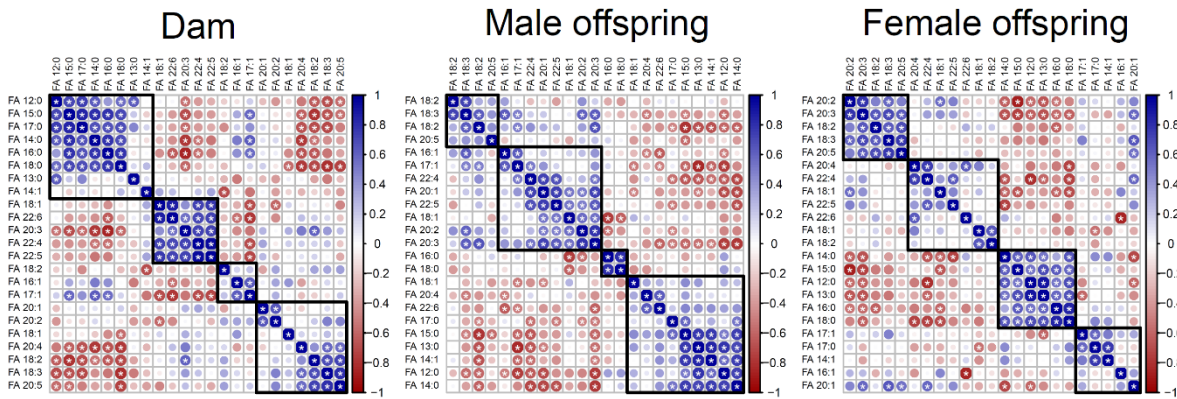

**Figure 3–figure supplement 2.** Correlation matrices showing Pearson's correlation between cardiac fatty acids in dams and fetuses. Fatty acids grouped following Euclidian clusterization.

157 ***Maternal obesity sex-specifically affects the fetal heart lipidome***

158 We next sought to determine whether the lipid composition of fetal hearts was influenced by  
159 maternal obesity and whether its signature would follow a similar pattern to that observed in  
160 the fetal serum. Full cardiac lipidome data and annotation of isobaric signals are available in  
161 the supplementary information (Supplementary file 2, Figure 4–source Data 1 and Figure 4–  
162 source Data 2). We observed that total cholesteryl esters were less abundant in both male and  
163 female fetal hearts from obese pregnancies (Figure 4A, 4B). Total sphingomyelins were more  
164 abundant in both males and females, but the difference was only statistically significant in  
165 female hearts (Figure 4B). The observation that fewer lipid classes were perturbed in males  
166 than in females in response to maternal obesity was reproduced at the individual species level.  
167 Through PCAs, we observed a weaker degree of separation between control and obese  
168 individual lipidomes in males (Figure 4C) when compared to females (Figure 4D). In contrast,  
169 female heart lipidomes showed clear distinction between control and obese hearts, with more

170 lipid species being significantly different between groups (42 compared to 18 in males) (Figures  
 171 4E, 4F and 4G).

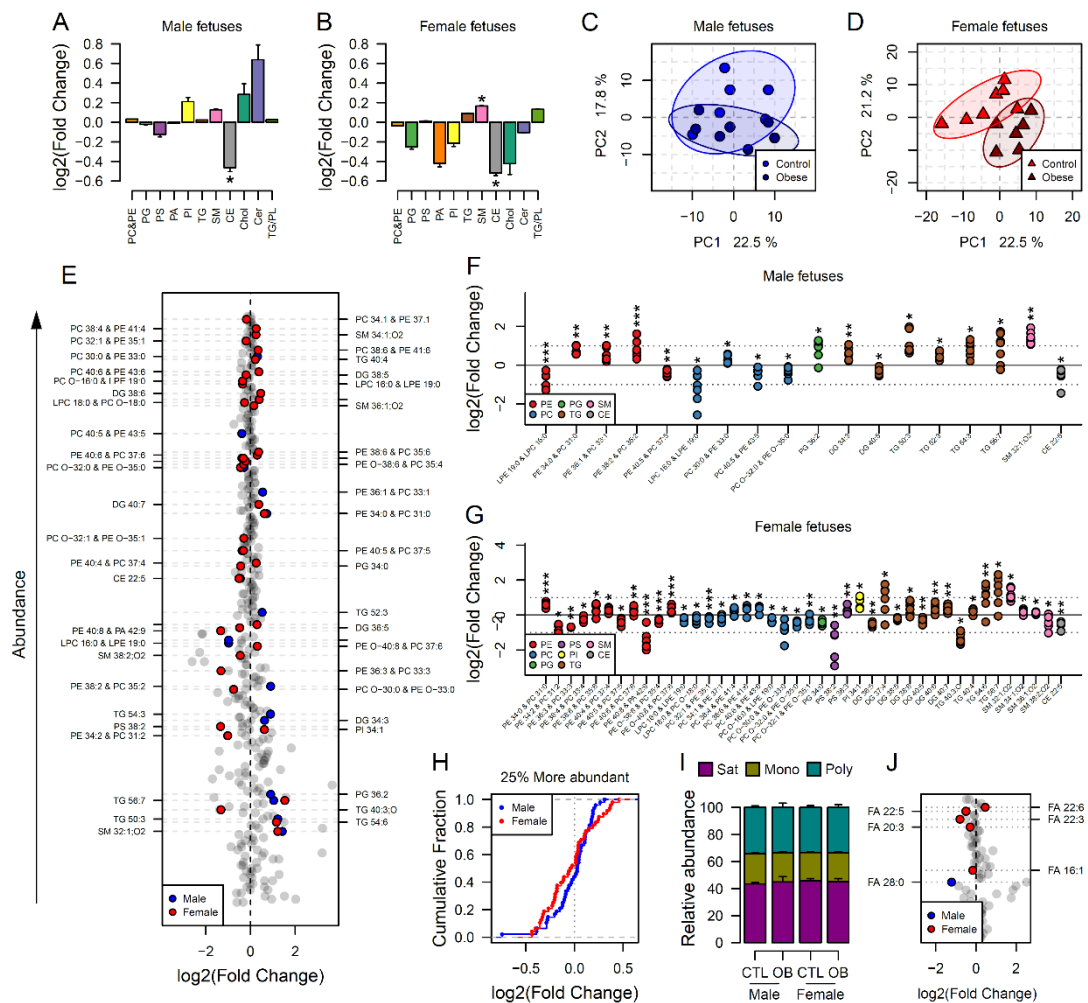

**Figure 4. Maternal and fetal cardiac lipidome.** (A-B) Relative changes in cardiac lipid classes in male (A) and female (B) fetuses from obese dams. Values are mean + SE. \* $p < 0.05$  calculated by Student t-test or Mann-Whitney test. (C-D) PCA plots showing the PC1 and PC2 scores for individual male (C) and female (D) cardiac lipidomes. (E) Regulation of fetal cardiac lipid species ranked according to their abundance. Coloured dots represent statistically regulated species as calculated by univariate Student t-test ( $p < 0.05$ ) and PLS-DA VIP ( $vip > 1$ ) in fetal OB hearts compared to CTL. (F-G) Cardiac levels of regulated lipids from male (F) and female (G) fetuses of obese dams at gestational day 18.5. Each dot represents a result from one obese heart, relative to the average of results for individual lipids in the control group (straight line). Male fetuses CTL  $n = 6$ , male fetuses OB  $n = 7$ , female fetuses CTL  $n = 7$ , female fetuses OB  $n = 6$ . \* $p < 0.05$ , \*\* $p < 0.01$ , \*\*\* $p < 0.001$  calculated by Student t-test. (H) Cumulative frequency of cardiac lipid species according to the log<sub>2</sub> of the fold change in abundance between male and female fetuses from obese and control dams. (I) Grouped saturated, monounsaturated and polyunsaturated fatty acids content in male and female fetal hearts at gestational day 18.5. (J) Regulation of maternal and fetal serum fatty acids. Coloured dots represent statistically regulated fatty acids as calculated by univariate Student t-test or Mann-Whitney test ( $p < 0.05$ ) in fetal OB hearts compared to CTL. Male fetuses CTL  $n = 8$ , male fetuses OB  $n = 6$ , female fetuses CTL  $n = 7$ , female fetuses OB  $n = 7$ . In figures A-B: PE, phosphatidylethanolamines/odd chain phosphatidylcholines; PC, phosphatidylcholines/odd-chain phosphatidylethanolamines; PC, phosphatidylcholines; PG, phosphatidylglycerols; PS, phosphatidylserines; PA, phosphatidic acids; PI, phosphatidylinositols; TG, monoglycerides, diglycerides and triglycerides; SM, sphingomyelins; CE, cholesteryl esters; Cer, ceramides; PL, phospholipids. In figures E-G, other isobaric lipids can contribute to these signals (Supplementary file 2). See also Figure 4-figure supplement 1 and Figure 4-figure supplement 2. Full data is available in Figure 4-source Data 1 and Figure 4-source Data 2.

172 Looking at the most abundant cardiac lipids, we observed that female hearts were more  
173 sensitive to change as a consequence of maternal obesity, with most lipids having greater fold  
174 change compared to male hearts (Figure 4H, see also Figure 3–figure supplement 1 and Figure  
175 4–figure supplement 1).

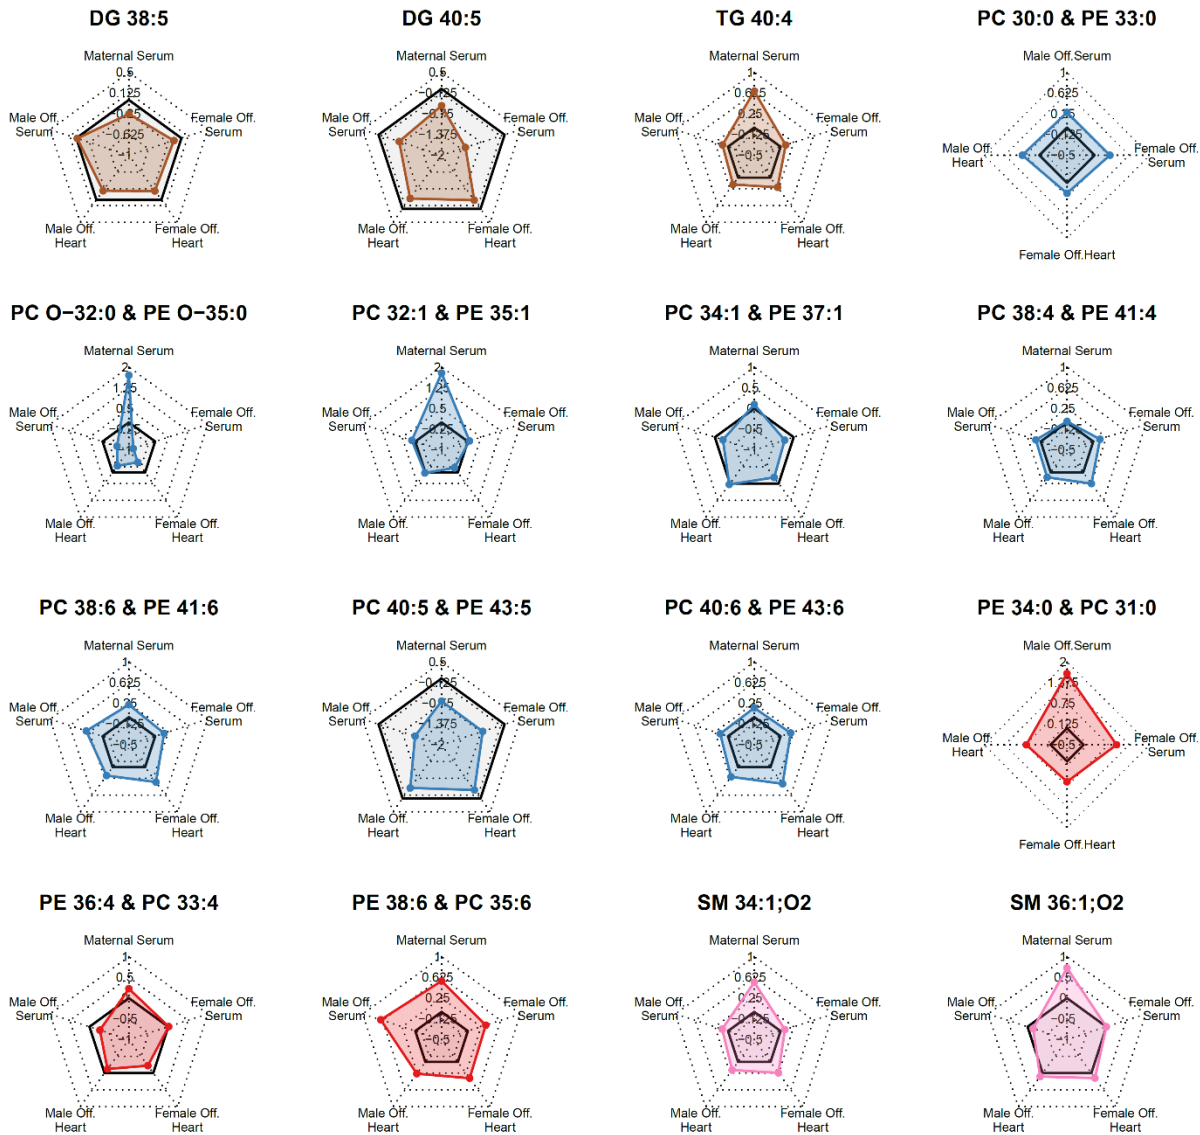

**Figure 4–figure supplement 1.** Radar plots showing log<sub>2</sub> of fold change of most abundant statistically regulated lipids in the heart of fetuses from obese pregnancies in different compartments. Grey shaded area indicates log<sub>2</sub> fold change smaller than 0.

176 Lipid ontology analysis of the fetal heart lipidome using LION (Moleenar et al., 2019) also  
177 identified more biological features significantly enriched in female hearts (Figure 4–figure  
178 supplement 2). This analysis also revealed an overall decrease in phospholipids and *lyso*-lipids

179 and, although not quantitatively significant, an increase in triglycerides in both males and  
180 females.

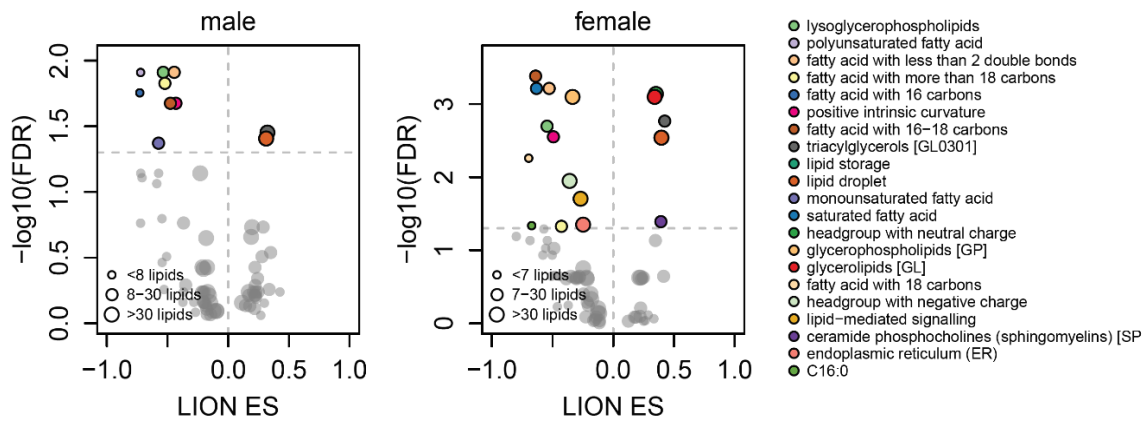

**Figure 4-figure supplement 2.** Scatterplots showing enrichment score (ES) and statistical significance of lipid ontology pathways from LION.

181 Consistently, most modelled triglycerides were more abundant, and most  
182 phosphatidylcholines/odd chain phosphatidylethanolamines were less abundant in both male  
183 and female hearts exposed to *in utero* obesity (Figure 4F, 4G). Phosphatidylethanolamines/odd  
184 chain phosphatidylcholines were also regulated in both male and female hearts, and  
185 sphingomyelins were regulated in females only. Regarding the fatty acid composition of  
186 phospholipids, we did not observe changes in the overall content of fatty acid groups (Figure  
187 4I). However, at the individual level, we observed lower abundance of DPA in both male and  
188 female hearts exposed to *in utero* obesity (Figure 4J). Male offspring also exhibited lower  
189 cardiac levels of  $m/z=423.421$ , tentatively identified as the very long-chain saturated  
190 octacosanoic acid (28:0), although other metabolites can contribute to this signal. In females,  
191 we observed increased abundance of highly abundant docosahexaenoic acid (22:6) and lower  
192 abundance of palmitoleic (16:1) and fatty acids 22:3 and 20:3.

193 ***Maternal obesity induces changes in the fetal heart transcriptome to promote lipid***  
194 ***metabolism***

195 Changes in the abundance of individual lipid isoforms and the fatty acid composition of lipid  
196 classes in cardiac cells could indicate lipid metabolism and cell morphology remodelling in  
197 cardiomyocytes. This led us to the hypothesis that maternal obesity caused changes in fetal  
198 heart lipid metabolism and biosynthesis. To identify the main gene pathways affected, we  
199 conducted RNA-Seq of male fetal hearts, followed by deep pathway enrichment analysis.  
200 Ingenuity Pathway Analysis revealed that a set of confidently top-regulated genes (FDR < 0.1)  
201 were associated with sterol, fatty acid and carnitine metabolism (Figure 5A), in a scenario where  
202 PPAR-alpha and HIF1A are main activated upstream transcriptional regulators, signalling by  
203 *lyso*-phosphatidylcholine (LPC) abundance is reduced and SREBP activity is downregulated  
204 (Figure 5B). Figure 5C shows expression of genes regulated by PPAR-alpha transcriptional  
205 activity, and expression of genes mapped to the main predicted IPA pathways. We later  
206 validated the expression of key genes associated with lipid metabolism in the hearts of both  
207 male and female offspring from a completely new cohort using qPCR (Figure 5D).



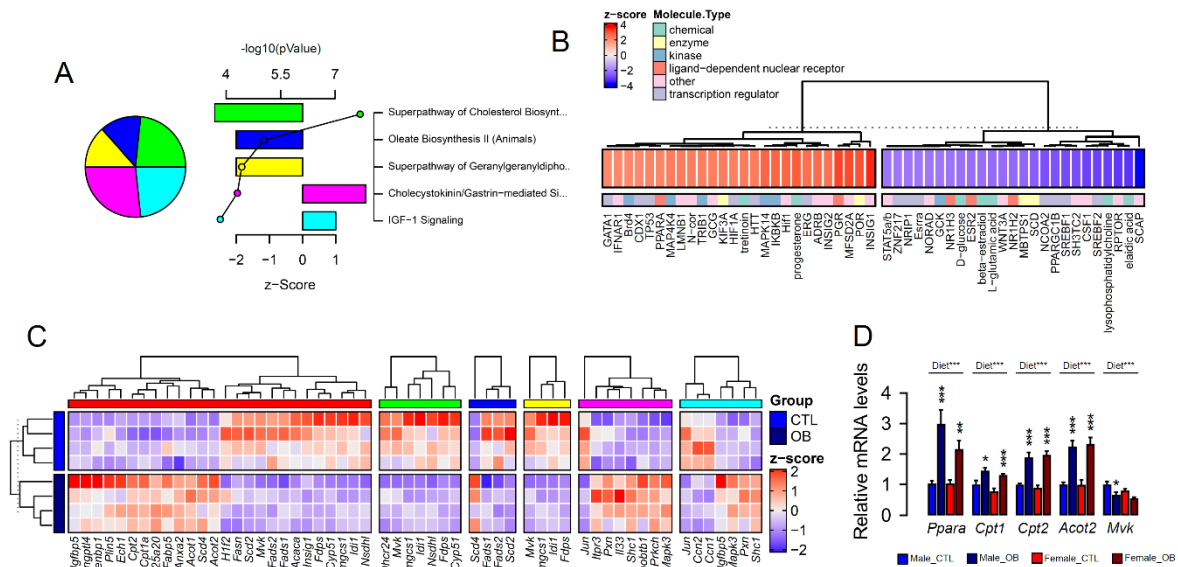

**Figure 5. Fetal cardiac transcriptomics.** (A) Top 5 regulated Ingenuity Canonical Pathways predicted by analysis of cardiac transcriptome from male fetuses from obese dams compared to fetuses from control dams. A p-value cut-off of 0.01 calculated by likelihood-ratio test was used to select regulated genes included in the IPA analysis. Pie chart represents number of genes per pathway; bars represent activation z-score per pathway; points represent p-value of enriched pathways estimated by IPA algorithm. (B) Activation z-score of top Ingenuity Upstream Regulators predicted by analysis of cardiac transcriptome from male fetuses from obese dams compared to fetuses from control dams. (C) Heatmap showing mRNA levels of genes regulated by PPAR-alpha activity (red bar), and genes mapped to “Superpathway of Cholesterol Biosynthesis” (green bar), “Oleate Biosynthesis II” (blue bar), “Superpathway of Geranylgeranyldiphosphate Biosynthesis I” (yellow bar), “Cholecystokinin/Gastrin-mediated Signalling” (pink bar) and “IGF-1 Signalling” (light blue bar) Ingenuity Canonical Pathways in male E18.5 hearts as analysed by RNA Seq. CTL n=4 and OB n=4. (D) mRNA levels of selected markers of lipid metabolism in male and female fetal hearts. Male CTL n=8, male OB n=8, female CTL n=6, female OB n=11. \*p<0.05, \*\*p<0.01, \*\*\*p<0.001 by Student t-test. Diet\*\*\*p<0.001 by factorial ANOVA.

208 **The abundance of acyl-carnitines in fetal hearts is associated with maternal obesity**

209 Having observed changes in transcriptional activity indicating increased lipid metabolism in

210 fetal hearts in response to maternal obesity, we conducted a final experiment to investigate

211 whether acyl-carnitine species were also affected by maternal obesity. These comprise fatty

212 acid residues produced during beta-oxidation and are markers of mitochondrial and

213 peroxisomal lipid metabolism. Regardless of the lack of significant differences between sex-

214 matched obese and control offspring (Figure 6A), we observed increased levels of total

215 hydroxylated acyl-carnitines in response to maternal obesity by factorial ANOVA (Figure 6B).

216 At the individual level, we found the hydroxylated acyl-carnitine C05-OH to be more abundant

217 in both males and females (Figure 6C, 6D, 6E), and C16-OH to be less abundant in females

218 only (Figure 6E). C12:0 and C12:1 were also more abundant, whereas C20:0 and C22:5 were

219 less abundant in obese female hearts (Figure 6E). In males, C3:0 was less abundant, and C11:0  
 220 and C15:0 were both more abundant (Figure 6D).

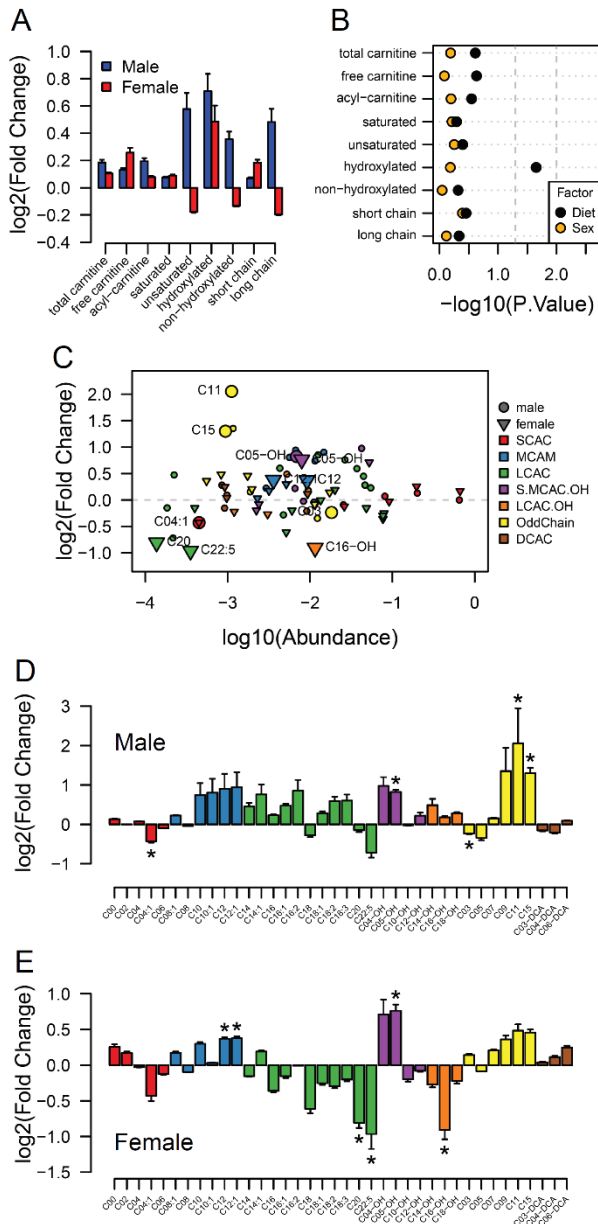

**Figure 6. Acyl-carnitine levels in fetal hearts measured by LC-MS.** (A) Relative changes in cardiac carnitine classes levels in male and female fetuses from obese dams. (B) Influence of maternal diet and sex on fetal cardiac carnitine classes levels as calculated by factorial ANOVA. (C) Relative fold change of individual acyl-carnitine levels in the heart of E18.5 fetuses from obese dams according to their abundance. Larger figures are acyl-carnitine species deemed as regulated with  $p < 0.05$  by Student t-test or Mann-Whitney test. SCAC: small-chain acyl-carnitine; MCAC: medium-chain acyl-carnitine; LCAC: long-chain acyl-carnitine; S.MCAC.OH: small- and medium-chain hydroxy acyl-carnitine, LCAC.OH: Long-chain hydroxy acyl-carnitine; Odd Chain: acyl-carnitines with an odd chain number; DCAC: dicarboxylic acylcarnitines. (D-E) Individual acyl-carnitine species levels in male (D) and female (E) fetal hearts at 18.5 days of pregnancy. See supplementary file 3 for list of full names. \* $p < 0.05$  by Student t-test or Mann-Whitney test. Male fetuses CTL  $n = 7$ , male fetuses OB  $n = 7$ , female fetuses CTL  $n = 7$ , female fetuses OB  $n = 6$ . Full data is available in Figure 6–source Data 1.

## 222 **DISCUSSION**

223 In this study, we investigated the effect of an obesogenic *in utero* environment on the fetal  
224 cardiac and serum lipidome and explored if any effects were sexually dimorphic. We report for  
225 the first time unique patterns in the lipidome of the fetal heart as a consequence of maternal  
226 obesity which, despite exposure to the same *in utero* environment and similar serum lipid  
227 profiles, differed between male and female fetuses. The findings were consistent with changes  
228 in substrate availability that may affect fetal cardiac gene expression which is known to change  
229 in late gestation in preparation for birth.

230 Using direct infusion lipidomics, we observed unique responses to a maternal obesogenic diet  
231 between dams and offspring. This is consistent with the suggestion that the mouse placenta  
232 selectively transports lipids to the fetus, adjusting placental transfer to changes in maternal  
233 status (Miranda, 2018). In this process, maternal lipoproteins are hydrolysed at the placenta and  
234 non-esterified fatty acids are released into the fetal circulation bound to alpha-fetoproteins.  
235 Fatty acids are then taken up by the fetal liver and incorporated into lipoproteins, which are  
236 released into the fetal circulation (Reviewed by Herrera and Desoye, 2016). Thus, a  
237 combination of selective fatty acid transport by the placenta and fetal metabolism can explain  
238 the difference between maternal and fetal serum lipid profiles in obese pregnancies.

239 The analysis of both male and female fetal hearts and serum is a major novelty and strength of  
240 this study, allowing for investigation of any sex-specific differences in response to maternal  
241 obesity. There is growing evidence to suggest that there are sex-specific differences in response  
242 to a suboptimal *in utero* environment or at least in the timing of the development of the  
243 phenotype, with the male fetus being generally more vulnerable to the long-term detrimental  
244 consequences (Nicholas *et al*, 2020; Dearden *et al*, 2018). In the current study, a greater number  
245 of significant differences between control and obese cardiac lipidomes were observed in female  
246 fetuses than were seen in males. This difference between the sexes is particularly striking, given

247 that fetuses of both sexes are exposed to the same maternal metabolic milieu. It is not clear if  
248 these sexually dimorphic responses early in life could represent an ability of females to adapt  
249 to the environment and to protect against longer term detrimental effects. Furthermore, although  
250 several individual lipid species displayed sex-dependent regulation, a similar overall impact of  
251 maternal obesity was observed in the serum lipidomes of both male and female offspring.  
252 Therefore, there were tissue specific effects of maternal obesity on the fetal serum and cardiac  
253 lipidomes. In the serum, triglycerides were more abundant, and several  
254 phosphatidylcholines/odd chain phosphatidylethanolamines were less abundant in response to  
255 maternal obesity.

256 The observed increase in fetal serum triglyceride and decrease in phosphatidylcholine/odd  
257 chain phosphatidylethanolamines abundances is suggestive of a change in lipoprotein  
258 composition. Previous studies showed that hyperlipidaemic human serum samples have a  
259 differential increase in the concentration of lipid species, with triglycerides increasing several  
260 fold whereas phosphatidylcholine only increased modestly (Kuklenyik *et al*, 2018). Although  
261 lipoprotein monolayers consist primarily of phosphatidylcholines enclosing a hydrophobic core  
262 containing triglycerides and cholesterol (Reviewed by Van der Veen *et al*, 2017), we do not  
263 necessarily expect a positive correlation between these two lipid classes. Lipoproteins are not  
264 always spherical and thus the relationship between particle surface area and volume is not  
265 uniform. Furthermore, high density lipoproteins (HDLs) comprise mainly phosphatidylcholines  
266 and very little triglyceride and, as the primary lipoprotein particles produced by the fetal liver  
267 are HDLs (Herrera and Desoye, 2016), a decrease in phosphatidylcholines without a  
268 corresponding decrease in triglyceride abundance may indicate a relative decrease in fetal HDL  
269 levels. A relative increase in triglyceride abundance in the absence of a relative increase in  
270 phosphatidylcholine may also indicate an increase in lipoprotein particle size with a smaller  
271 surface/core volume ratio in obese offspring (Kuklenyik *et al*, 2018).

272 Regardless of the precise mechanisms involved, the fetal serum signature indicates that  
273 maternal obesity causes deep changes to the lipids in the circulation of fetuses and thus those  
274 available to be taken up by fetal tissues. We observed that DPA – a 22:5 long-chain  
275 polyunsaturated fatty acid – from phospholipids was consistently lower in obese dams and in  
276 the serum and cardiac tissues of fetuses of both sexes. DPA is highly abundant in fish oils but  
277 can also be synthesized endogenously through eicosapentaenoic acid and arachidonic acid  
278 metabolism (Burdge *et al.*, 2002). Lower serum levels of this fatty acid have recently been  
279 associated with increased markers of insulin resistance and with increased cardiovascular risk  
280 in pregnant women (Zhu *et al.*, 2019). However, as far as we are aware, a direct relationship  
281 between this fatty acid and fetal health has not yet been drawn, and we believe we are the first  
282 to identify a relative reduction of phospholipid-derived DPA levels in multiple fetal  
283 compartments. Moreover, similar changes in serum and cardiac fatty acid composition of lipids  
284 might also indicate that the fetal myocardium exposed to maternal-obesity-induced stress  
285 maintains its ability to uptake circulating fatty acids.

286 We observed changes in the fetal cardiac transcriptome that were induced by maternal obesity,  
287 including changes in regulation of genes associated with sterol, fatty acid and carnitine  
288 metabolism, that would indicate an early shift towards fatty acid oxidation. The fetal heart relies  
289 predominantly on glycolytic metabolism, however, at birth there is a switch to lipid oxidative  
290 metabolism. Increasing oxygen levels and high lipid availability in the maternal milk both play  
291 a crucial role in activating pathways that will ultimately lead to metabolic, physiological and  
292 morphological changes, resulting in postnatal heart maturation (Piquereau and Ventura-Clapier,  
293 2018). The current observations therefore suggest that fatty acid availability drives a premature  
294 switch in metabolism from glucose to fatty acid oxidation in the fetal heart through PPAR-alpha  
295 activation by ligands, such as docosahexaenoic acid (22:6). This indicates early metabolic,

296 though not morphological, maturation due to a change in the availability of nutrients to fetal  
297 tissues from obese pregnancies, which could have a long-term impact on cardiac function.  
298 Previous studies have suggested that maternal obesity results in placental hypoxia and a  
299 reduction in the availability of oxygen to other fetal tissues (Wallace *et al*, 2019). Consistently,  
300 we previously observed increased HIF1A protein in the obese placenta (Fernandez-Twinn *et*  
301 *al.*, 2017), indicating lower oxygen diffusion to the fetal tissues which would be expected to  
302 impair fatty acid oxidation. Indeed, despite the increased expression of *Cpt* genes, we observed  
303 cardiac accumulation of total hydroxy acyl-carnitine, an intermediate of beta-oxidation  
304 (Ventura *et al*, 1998). CPT proteins are required for fatty acid mitochondrial import and  
305 oxidation through addition and removal of carnitine from acyl groups, allowing their transport  
306 through the intermembrane space. Accumulation of total hydroxy acyl-carnitine is also  
307 observed in diabetic hearts (Su *et al*, 2005), and may indicate impaired mitochondrial capacity  
308 to completely metabolize the fatty-acid surplus in the matrix. Therefore, the expression of  
309 lipolytic genes alone may not be sufficient to compensate for the surplus in fatty acids and to  
310 increase the energy production and contractile potential of the fetal heart in a hypoxic  
311 environment. This may contribute to the reduced cardiomyocyte cell size, as observed in the  
312 female hearts from obese mothers. Nevertheless, further studies are required to define the fatty  
313 acid oxidation rates and energy balance in the fetal heart.

314 In conclusion, we have carried out a comprehensive study of how obesity during pregnancy  
315 influences lipid availability to the fetus and consequently affects the fetal heart lipidome. From  
316 our findings, three main principles emerge: (1) There is a discrepancy between how the  
317 maternal metabolic status affects the maternal and fetal serum lipidome, an outcome likely  
318 related both to the placental actions as a selective barrier and to changes in fetal metabolism;  
319 (2) Despite being exposed to the same maternal metabolic milieu, male and female fetal hearts  
320 show distinct responses to maternal obesity, mainly at the level of fatty acid residues and

321 individual lipid isoforms. Female heart lipidomes were generally more sensitive and exhibited  
322 greater changes than males. Cardiac morphological changes were also uniquely observed in  
323 females at this age; (3) Changes in lipid supply resulting from maternal obesity might contribute  
324 to early expression of lipolytic genes in mouse hearts, possibly contributing to the previously  
325 observed changes in heart function in adult life. The precise mechanisms by which these  
326 alterations impact on long term cardiovascular health across the life course remains to be  
327 determined.

## 328 **MATERIAL AND METHODS**

### 329 *Lead contact*

330 Further information and requests for resources and reagents should be directed to and will be  
331 fulfilled by the Lead Contact, Lucas Carminatti Pantaleão ([lp435@medschl.cam.ac.uk](mailto:lp435@medschl.cam.ac.uk)).

332

### 333 *Data and Code Availability*

334 The transcriptomics and lipidomics datasets generated during this study are available at GEO  
335 [GSE162185] and as supplemental material (Figure 2–source data 1, Figure 3–source data 1,  
336 Figure 4–source data 1, Figure 4–source data 2 and Figure 6 – source data 1), respectively.

337

### 338 *Animal handling*

339 This research was regulated under the Animals (Scientific Procedures) Act 1986 Amendment  
340 Regulations 2012 following ethical review by the University of Cambridge Animal Welfare  
341 and Ethical Review Body (AWERB). Female C57BL/6J mice were randomly allocated to  
342 receive either commercial standard (RM1) or a high fat diet [20% lipids (Special Dietary  
343 Services)] plus sweetened condensed milk [55% simple carbohydrates/8% lipids (Nestle, UK)]  
344 from weaning. After around 6 weeks on their respective diets, mice were mated with male  
345 counterparts and went through a first pregnancy and lactation to ensure their breeding  
346 competence. Mice were mated a second time, and first day of pregnancy was marked by the  
347 detection of a vaginal plug. On day 18.5 of gestation, pregnant mice were culled by rising CO<sub>2</sub>  
348 concentrations or cervical dislocation. Fetuses were surgically removed and immediately  
349 euthanised by laying in cold buffer. Fetal heart ventricles were dissected, weighed, snap frozen  
350 and stored at –80 °C or whole fetal torsos were fixed in 10% neutral buffered formalin. Maternal  
351 blood was collected by cardiac puncture and fetal trunk blood was collected following *post-*



352 *mortem* head removal. All blood samples were processed for serum separation following  
353 standard protocol.

354

### 355 ***Histology***

356 Fixed fetal torsos were processed, embedded in paraffin and sectioned in the coronal plane at  
357 10 $\mu$ m using a microtome (Leica Microsystems). Two to three slides for each fetus containing  
358 mid-cardiac sections were selected, processed, and stained with haematoxylin and eosin.  
359 Sections were imaged using a Slide Scanner Axio Scan Z1 (Zeiss, Germany). Nuclei counting  
360 analyses were performed blinded using open source digital analysis software (QuPath v0.2.0;  
361 Bankhead et al., 2017). The total cardiac region was manually selected, with the epicardium  
362 excluded, and colour deconvolution applied to the image to optimise stain separation. A  
363 composite training image consisting of randomly sampled regions from a subset of images was  
364 used to train a classifier to identify cardiac tissue from lumen and blood vessels, and nuclei  
365 detection was run on the classified tissue using automatic cellular detection after parameter  
366 optimisation (setup parameters of detection image: haematoxylin OD, pixel size: 0.5 $\mu$ m;  
367 nucleus parameters of background radius: 7 $\mu$ m, median filter radius: 0 $\mu$ m, sigma: 2 $\mu$ m,  
368 minimum area: 10 $\mu$ m<sup>2</sup>, maximum area: 400 $\mu$ m<sup>2</sup>, threshold: 0.15, max background intensity: 2,  
369 split by shape: TRUE). Automatic cellular detection was validated for a subset of images by  
370 manual counting of nuclei for random fields of view which sampled approximately 5-10% of  
371 the tissue.

372

### 373 ***qPCR and RNA Sequencing***

374 Cardiac RNA from male fetuses was extracted using a Qiazol/miRNeasy mini kit protocol  
375 (Qiagen, Hilden, Germany). Library preparation for mRNA sequencing followed manufacturer  
376 protocol of TruSeq RNA Library Preparation kit (Illumina, Cambridge, UK). Libraries were

377 sequenced using a HiSeq 4000 platform and raw reads were mapped to mouse genome through  
378 bowtie v1.2.3. For RT-qPCR, RNA was reverse-transcribed using a High-Capacity cDNA  
379 Reverse Transcription Kit (Thermo-Fisher, Waltham, MA, USA). QPCR reactions were  
380 prepared using SYBR Green Master Mix (Thermo-Fisher) and specific primers. Fold changes  
381 were calculated by the  $2^{-\Delta\Delta CT}$  method using *Hprt* and *Sdha* as housekeeping genes. Primers  
382 and oligonucleotides used in this study are listed in Figure 5—source data 1.

383

#### 384 ***Untargeted Lipidomics – Preparation of Samples***

385 Solvents were purchased from Sigma-Aldrich Ltd (Dorset, UK) of at least HPLC grade and  
386 were not purified further. Lipid standards were purchased from Avanti Polar lipids (Alabaster,  
387 AL; via Instruchemie, Delfzijl, NL) and C/D/N/ isotopes (Quebec, Canada; via Qmx  
388 Laboratories, Thaxted, UK) and used without purification. Consumables were purchased from  
389 Sarstedt AG & Co (Leicester, UK) or Wolf Labs (Wolverhampton, UK).

390 The methods for preparing samples and extracting lipids used was described recently (Furse *et*  
391 *al.*, 2020). Briefly, frozen whole fetal hearts were homogenised in a stock solution of guanidine  
392 and thiourea (6M/1.5M; 20× w/v) using mechanical agitation. The dispersions were freeze-  
393 thawed once before being centrifuged (12,000 × g, 10 min). The supernatant was collected and  
394 frozen (-80 °C) immediately. The thawed dispersion (60 µL) and serum aliquots (20 µL) were  
395 injected into wells (96w plate, Esslab Plate+™, 2.4 mL/well, glass-coated) followed by internal  
396 standards (150 µL, mixture of Internal Standards in methanol), water (500 µL) and DMT (500  
397 µL, dichloromethane, methanol and triethylammonium chloride, 3:1:0.005). The mixture was  
398 agitated (96 channel pipette) before being centrifuged (3.2 × g, 2 min). A portion of the organic  
399 solution (20 µL) was transferred to an analytical plate (96w, glass coated, Esslab Plate+™)  
400 before being dried under Nitrogen gas. The dried films were re-dissolved (TBME, 30 µL/well)  
401 and diluted with a stock mixture of alcohols and ammonium acetate (100 µL/well; propan-2-ol:

402 methanol, 2:1; CH<sub>3</sub>COO.NH<sub>4</sub>, 7.5 mM). The analytical plate was heat-sealed and run  
403 immediately.

404

#### 405 ***Untargeted Lipidomics – Direct Infusion Mass Spectrometry***

406 Samples were directly infused into an Exactive Orbitrap (Thermo, Hemel Hempstead, UK),  
407 using a TriVersa NanoMate (Advion, Ithaca, US) for Direct Infusion Mass Spectrometry  
408 (Harshfield *et al.*, 2019, Furse *et al.*, 2020). A three-part analytical method was used (Furse *et al.*,  
409 *et al.*, 2020, Furse and Koulman *et al.*, 2019) in which samples were ionised in positive, negative,  
410 and then negative-with collision-induced-ionisation modes. The NanoMate infusion mandrel  
411 was used to pierce the seal of each well before an aliquot of the solution (15 µL) was collected  
412 with an air gap (1.5 µL). The tip was pressed against a fresh nozzle and the sample was  
413 dispensed using 0.2 psi (N<sub>2(g)</sub>). Ionisation was achieved at a 1.2 kV. The Exactive was set to  
414 start acquiring data 20 s after sample aspiration began. The data were collected with a scan rate  
415 of 1 Hz (resulting in a mass resolution of 65,000 full width at half-maximum (fwhm) at 400  
416 *m/z*). After 72 s of acquisition in positive mode the NanoMate and the Exactive switched to  
417 negative mode, decreasing the voltage to -1.5 kV. The spray was maintained for another 66 s,  
418 after which Collision-Induced Dissociation (CID) commenced, with a mass window of 50–  
419 1000 Da, and was stopped after another 66 s. The analysis was then stopped, and the tip  
420 discarded before the analysis of the next sample began. The sample plate was kept at 10 °C  
421 throughout the data acquisition. Samples were run in row order.

422 Raw high-resolution mass-spectrometry data were processed using XCMS  
423 ([www.bioconductor.org](http://www.bioconductor.org)) and Peakpicker v 2.0 (an in-house R script, Harshfield *et al.*, 2019).  
424 Theoretical lists of known species (by *m/z*) were used for both positive ion and negative ion  
425 mode (~8.5k species including different adducts and fragmentations). Variables whose mass  
426 deviated by more than 9 ppm from the expected value, had a signal-to-noise ratio of <3 and had

427 signals for fewer than 20% of samples were discarded. The correlation of signal intensity to  
428 concentration of lipid variables found in pooled mouse heart homogenate, pooled mouse liver  
429 homogenate, and pooled human serum samples (0.25, 0.5, 1.0×) was used to identify the lipid  
430 signals the strength of which was linearly proportional to abundance ( $r > 0.75$ ) in samples.  
431 For the detection of fatty acids of phospholipids only, a deviations threshold of 12.5ppm was  
432 used for processing of the negative mode with CID, on a list of fatty acids of chain length 14 to  
433 36 with up to six double bonds and/or one hydroxyl group. All signals greater than noise were  
434 carried forward. In this method the lipidome is not separated chromatographically but measured  
435 only by mass-to-charge ratio and therefore cannot distinguish lipids that are isobaric (identical  
436 molecular mass) in a given ionisation mode. In this study, the identification of the lipids was  
437 based on their accurate mass in positive ionization mode according to Lipid Maps structure  
438 database (Sud *et al.*, 2007). In case of multiple isobars per lipid signal, the likely identification  
439 was predicted according to the biological likelihood, full list of possible annotations can be  
440 found in the supplementary information (Supplementary file 1 and supplementary file 2).  
441 Signals consistent with fatty acids were found in 3/3 samples checked manually. Relative  
442 abundance was calculated by dividing each signal by the sum of signals for that sample,  
443 expressed per mille (‰). Zero values were interpreted as not measured and for the remaining  
444 non-assigned values, we used a known single component projection based on nonlinear iterative  
445 partial least squares algorithm (Nelson *et al.*, 1996) to impute values and populate the dataset.  
446 Data was normalized using quantile Cyclic Loess method and statistical calculations were done  
447 on these finalised values.

448

#### 449 *Acyl-carnitine Analysis – Preparation of Samples*

450 All solvents and additives were of HPLC grade or higher and purchased from Sigma Aldrich  
451 unless otherwise stated.

452 The protein precipitation liquid extraction protocol was as follows: the tissue samples were  
453 weighed (between 1.4 - 11.0 mg) and transferred into a 2 mL screw cap Eppendorf plastic tubes  
454 (Eppendorf, Stevenage, UK) along with a single 5 mm stainless steel ball bearing. Immediately,  
455 400  $\mu$ L of chloroform and methanol (2:1, respectively) solution was added to each sample,  
456 followed by thorough mixing. The samples were then homogenised in the chloroform and  
457 methanol (2:1, respectively) using a Bioprep 24-1004 homogenizer (Allsheng, Hangzhou City,  
458 China) run at speed; 4.5 m/s, time; 30 seconds for 2 cycles. Then, 400  $\mu$ L of chloroform, 100  
459  $\mu$ L of methanol and 100  $\mu$ L of the stable isotope labelled acyl-carnitine internal standard;  
460 containing butyryl-d7-L-carnitine (order number: D-7761, QMX Laboratories Ltd. (QMX  
461 Laboratories Ltd, Essex, United Kingdom)) and hexadecanoylLcarnitine-d3 (order number: D-  
462 6646, QMX Laboratories Ltd.) at 5  $\mu$ M in methanol was added to each sample. The samples  
463 were homogenised again using a Bioprep 24-1004 homogenizer run at speed; 4.5 m/s, time; 30  
464 seconds for 2 cycles. To ensure fibrous material was diminished, the samples were sonicated  
465 for 30 minutes in a water bath sonicator at room temperature (Advantage-Lab, Menen,  
466 Belgium). Then, 400  $\mu$ L of acetone was added to each sample. The samples were thoroughly  
467 mixed and centrifuged for 10 minutes at  $\sim$ 20,000 g to pellet any insoluble material at the bottom  
468 of the vial. The single layer supernatant was pipetted into separate 2 mL screw cap amber-glass  
469 autosampler vials (Agilent Technologies, Cheadle, United Kingdom); being careful not to break  
470 up the solid pellet at the bottom of the tube. The organic extracts (chloroform, methanol, acetone  
471 composition;  $\sim$ 7:3:4,  $\sim$ 1.4 mL) were dried down to dryness using a Concentrator Plus system  
472 (Eppendorf, Stevenage, UK) run for 60 minutes at 60 degree Celsius. The samples were  
473 reconstituted in 100  $\mu$ L of water and acetonitrile (95:5, respectively) then thoroughly mixed.  
474 The reconstituted sample was transferred into a 250  $\mu$ L low-volume vial insert inside a 2 mL  
475 amber glass auto-sample vial ready for liquid chromatography with mass spectrometry  
476 detection (LC-MS) analysis.

477  
478 *Acyl-carnitine Analysis – Liquid Chromatography Mass Spectrometry*

479 Full chromatographic separation of acyl-carnitines was achieved using Shimadzu HPLC  
480 System (Shimadzu UK Ltd., Milton Keynes, United Kingdom) with the injection of 10  $\mu$ L onto  
481 a Hichrom ACE Excel 2 C18-PFP column (Hichrom Ltd., Berkshire, United Kingdom); 2.0  
482  $\mu$ m, I.D. 2.1 mm X 150 mm, maintained at 55 °C. Mobile phase A was water with 0.1% formic  
483 acid. Mobile phase B was acetonitrile with 0.1% formic acid. The flow was maintained at 500  
484  $\mu$ L per minute through the following gradient: 0 minutes\_5% mobile phase B, at 0.5  
485 minutes\_100% mobile phase B, at 5.5 minutes\_100% mobile phase B, at 5.51 minutes\_5%  
486 mobile phase B, at 7 minutes\_5% mobile phase B. The sample injection needle was washed  
487 using acetonitrile and water mix (1:1, respectively). The mass spectrometer used was the  
488 Thermo Scientific Exactive Orbitrap with a heated electrospray ionisation source (Thermo  
489 Fisher Scientific, Hemel Hempstead, UK). The mass spectrometer was calibrated immediately  
490 before sample analysis using positive and negative ionisation calibration solution  
491 (recommended by Thermo Scientific). Additionally, the heated electrospray ionisation source  
492 was optimised to ensure the best sensitivity and spray stability (capillary temperature; 300  
493 degree Celsius, source heater temperature; 420 degree Celsius, sheath gas flow; 40 (arbitrary),  
494 auxiliary gas flow; 15 (arbitrary), spare gas; 3 (arbitrary), source voltage; 4 kV. The mass  
495 spectrometer scan rate set at 2 Hz, giving a resolution of 50,000 (at 200 m/z) with a full-scan  
496 range of m/z 150 to 800 in positive mode.

497 Thermo Xcalibur Quan Browser data processing involved the integration of the internal  
498 standard extracted ion chromatogram (EIC) peaks at the expected retention times: butyryl-d7-  
499 L-carnitine ( $[M+H]^+$ , m/z 239.19827 at 1.20 minutes) and hexadecanoyl-L-carnitine-d3  
500 ( $[M+H]^+$ , m/z 403.36097 at 4.20 minutes). The data processing also involved the integration  
501 of the targeted individual acyl-carnitine species (m/z was  $[M+H]^+$ ) at their expected retention

502 time allowing for a maximum of  $\pm 0.1$  minutes of retention time drift: any retention time drift  
503 greater than  $\pm 0.1$  minutes resulted in the exclusion of the analyte leading to a 'Not Found' result  
504 (i.e., zero concentration). Through the Thermo Xcalibur Quan Browser software the responses  
505 of the analytes were normalised to the relevant internal standard response (producing area  
506 ratios), these area ratios corrected the intensity for any extraction and instrument variations.  
507 The area ratios were then blank corrected where intensities less than three times the blank  
508 samples were set to a 'Not Found' result (i.e., zero concentration). The accepted area ratios  
509 were then multiplied by the concentration of the internal standard ( $5 \mu\text{M}$ ) to give the analyte  
510 concentrations. For tissue samples, the calculated concentrations ( $\mu\text{M}$ ) of the analytes were then  
511 divided by the amount of tissue (in mg) used in the extraction protocol to give the final results  
512 in  $\mu\text{M}$  per mg of tissue extracted ( $\mu\text{M}/\text{mg}$ ).

513

#### 514 *Sample-size estimation*

515 Due to the untargeted high-throughput aspect of this study and to the scarcity of available data  
516 into fetal lipidomics, the use of a power analysis accounting for changes in fetal cardiac lipids  
517 to predict sample size was challenging. The number of animals used in the present study was  
518 therefore predicted using previously obtained data on histological assessment of the ratio left  
519 ventricle:lumen in the male fetal heart, and on the extensive track record of published studies  
520 from our research group using the same maternal obesity model employed in the current study.  
521 According to an *a priori* unpaired t-test power calculation, an n equal or greater than 5 would  
522 be required to achieve significance set at  $\alpha < 0.05$ , 80% power. Also, according to the resource  
523 equation, an n equal to or greater than 6 results in more than 10 degrees of freedom, and is  
524 therefore adequate. We then concluded that a sample size greater than 6 would be necessary to  
525 show any significant changes in our study.

526

527 ***Biometric markers and qPCR – Statistical Analysis***

528 Details of statistical analysis (statistical tests used, number of animals and precision measures)  
529 can be found in the figure legends. Simple Student t-test was employed to identify statistically  
530 significant differences in all biometric, histological and qPCR analysis, comparing control and  
531 obese groups in a sex-dependent manner. Factorial ANOVA was employed to test offspring sex  
532 and maternal status influence on individual mRNA levels.

533

534 ***RNASeq – Statistical Analysis***

535 Reads per Kilobase of transcript per Million mapped reads (RPKM) were produced from RNA  
536 Sequencing raw output and statistically analysed through likelihood ratio test using R version  
537 3.6.3. Core analysis in Ingenuity® Pathway Analysis application (IPA – Qiagen) was used in  
538 data interpretation and pathway enrichment. A p-value cut-off of 0.01 was used to determine  
539 genes to be mapped to IPA networks.

540

541 ***Untargeted and Targeted Lipidomics – Statistical Analysis***

542 Uni- and multivariate statistical models were created using R version 3.6.3. Multiple Shapiro-  
543 Wilk tests were carried out to identify if individual variables were normally distributed.  
544 Multiple t-tests were used to identify significant regulation of individual lipid species, and  
545 multiple t-tests or Mann-Whitney tests were used to identify individual lipid classes differences  
546 between groups when individual variables were normally or non-normally distributed. A  
547 multivariate partial-least square discriminatory analysis (PLS-DA) was also employed to  
548 identify Variable Importance in the Projection (VIP) and determine individual lipids that  
549 maximise the model classification ability. For individual lipid species, variables were deemed  
550 significantly regulated and relevant when p-value < 0.05 and vip score > 1. Individual lipid  
551 classes, acyl-carnitines and fatty acids were significantly regulated when  $p < 0.05$ . Factorial



552 ANOVA was also used to test offspring sex and maternal status influence over individual lipid  
553 classes, and pools of fatty acids and acyl-carnitines. Prior to statistical analysis, outlier samples  
554 were identified through a combination of frequency distribution analysis, lipid classes  
555 frequency investigation, PCA and hierarchical clustering analysis. Samples with lower than  
556 66.7% of lipid signals detected or deemed as outliers in all the aforementioned analyses failed  
557 the quality control for mass spectrometry and were excluded from the datasets and from further  
558 statistical tests. Lipid ontology enrichment analysis was carried out using LION (Molenaar *et*  
559 *al.*, 2019). Lipid traffic analysis was conducted following previously described methods (Furse  
560 *et al.*, 2020).

561 **COMPETING INTERESTS**

562 The authors declare no competing interests.

563 **SUPPLEMENTAL MATERIAL LEGENDS**

564 Figure 2–figure supplement 1. (A) PCA plots showing the PC1 and PC2 scores for individual  
565 dam and fetal serum lipidomes at gestational day 18.5. (B-D) PCA plots showing the PC1 and  
566 PC2 scores for individual dam (B), male (C) and female fetal (D) serum lipidomes.

567

568 Figure 2–figure supplement 2. (A) Heatmap showing lipid classes serum levels in male and  
569 female E18.5 fetuses. (B-C) Pearson’s correlation between individual lipid species in maternal  
570 serum and male (B) and female (C) fetal serum at gestational day 18.5. Blue dots represent  
571 positively correlated lipid species between maternal and fetal serum deemed statistically  
572 significant ( $p < 0.05$ ). Red dots represent negatively correlated lipid species between maternal  
573 and fetal serum deemed statistically significant ( $p < 0.05$ ). (D) Relative amount of different lipid  
574 classes in maternal and fetal serum smaller than 0

575

576 Figure 3–figure supplement 1. Radar plots showing  $\log_2$  of fold change of fatty acids  
577 statistically changed in the serum or in the heart of fetuses from obese dams in different  
578 compartments. Grey shaded area indicates  $\log_2$  fold change smaller than 0.

579

580 Figure 3–figure supplement 2. Correlation matrices showing Pearson’s correlation between  
581 cardiac fatty acids in dams and fetuses. Fatty acids grouped following Euclidian clusterization.

582

583 Figure 4–figure supplement 1. Radar plots showing  $\log_2$  of fold change of most abundant  
584 statistically regulated lipids in the heart of fetuses from obese pregnancies in different  
585 compartments. Grey shaded area indicates  $\log_2$  fold change smaller than 0.

586

587 Figure 4–figure supplement 2. Scatterplots showing enrichment score (ES) and statistical  
588 significance of lipid ontology pathways from LION.

589

590 Supplementary file 1. Isobars and main predicted classes for m/z detected in direct infusion  
591 high-resolution mass spectrometry of the serum (positive mode only). Isobar annotations were  
592 obtained from LIPID MAPS Structure Database and a mass tolerance (m/z) threshold: +/- 0.001  
593 was used. For multiple isobars per m/z, biological likelihood was employed to predict the likely  
594 identification. Main classes were predicted according to the likely identification.

595

596 Supplementary file 2. Isobars and main predicted classes for m/z detected in direct infusion  
597 high-resolution mass spectrometry of the heart (positive mode only). Isobar annotations were  
598 obtained from LIPID MAPS Structure Database and a mass tolerance (m/z) threshold: +/- 0.001  
599 was used. For multiple isobars per m/z, biological likelihood was employed to predict the likely  
600 identification. Main classes were predicted according to the likely identification.

601

602 Supplementary file 3. List of names for acyl-carnitines identified in E18.5 fetal hearts by LCMS

603

604 Figure 2–source data 1. Direct infusion high-resolution mass spectrometry of the serum  
605 (positive mode only). Scaled raw data and statistical significance.

606

607 Figure 3–source data 1. Fatty acids abundance obtained by direct infusion high-resolution mass  
608 spectrometry of the serum (negative mode). Scaled raw data and statistical significance.

609

610 Figure 4–source data 1. Direct infusion high-resolution mass spectrometry of the heart (positive  
611 mode only). Scaled raw data and statistical significance.

612

613 Figure 4—source data 2. Fatty acids abundance obtained by direct infusion high-resolution mass  
614 spectrometry of the heart (negative mode). Scaled raw data and statistical significance.

615

616 Figure 5—source data 1. Sequence-specific primers for qPCR.

617

618 Figure 6—source data 1. Acyl-Carnitines abundance obtained by spectrometry of the heart  
619 (negative mode). Raw data and statistical significance.

620 **REFERENCES**

- 621 Bankhead, P., Loughrey, M.B., Fernández, J.A., Dombrowski, Y., McArt, D.G., Dunne, P.D.,  
622 McQuaid, S., Gray, R.T., Murray, L.J., Coleman, H.G., James, J.A., Salto-Tellez, M., and  
623 Hamilton, P.W. (2017). QuPath: Open source software for digital pathology image analysis.  
624 *Sci. Rep.* 7(1), 16878. doi: 10.1038/s41598-017-17204-5.
- 625 Barker, D.J. (2007). The origins of the developmental origins theory. *J. Intern. Med* 261(5),  
626 412–17. doi: 10.1111/j.1365-2796.2007.01809.x.
- 627 Burdge, G., Jones, A., and Wootton, S. (2002). Eicosapentaenoic and docosapentaenoic acids  
628 are the principal products of  $\alpha$ -linolenic acid metabolism in young men. *Br. J. Nutr.* 88(4), 355–  
629 363. doi: 10.1079/BJN2002662.
- 630 Catalano, P. M., and Shankar, K. (2017). Obesity and pregnancy: mechanisms of short term  
631 and long term adverse consequences for mother and child. *BMJ (Clinical research ed.)*, 356.  
632 doi: 10.1136/bmj.j1.
- 633 Dearden, L., Bouret, S. G., and Ozanne, S. E. (2018). Sex and gender differences in  
634 developmental programming of metabolism. *Mol. Metab.* 15, 8–19. doi:  
635 10.1016/j.molmet.2018.04.007.
- 636 Dong, M., Zheng, Q., Ford, S.P., Nathanielsz, P.W., Ren, J. (2012). Maternal obesity,  
637 lipotoxicity and cardiovascular diseases in offspring. *J. Mol. Cell Cardiol.* 55, 111–6. doi:  
638 10.1016/j.yjmcc.2012.08.023.
- 639 Eum, J., Lee, J., Yi, S., Kim, I., Seong, J. and Moon, M. (2020). Aging-related lipidomic  
640 changes in mouse serum, kidney, and heart by nanoflow ultrahigh-performance liquid  
641 chromatography-tandem mass spectrometry. *J. Chromatogr.* 1618, 460849. doi:  
642 10.1016/j.chroma.2020.460849.

643 Fernandez-Twinn, D.S., Gascoin, G., Musial, B., Carr, S., Duque-Guimaraes, D., Blackmore,  
644 H.L., Alfaradhi, M.Z., Loche, E., Sferruzzi-Perri, A.N., Fowden, A.L., Ozanne, S.E. (2017).  
645 Exercise rescues obese mothers' insulin sensitivity, placental hypoxia and male offspring  
646 insulin sensitivity. *Sci. Rep.* 7, 44650. doi: 10.1038/srep44650.

647 Furse, S., Fernandez-Twinn, D.S., Jenkins, B., Meek, C.L., Williams, H.E.L., Smith, G.C.S.,  
648 Charnock-Jones, D.S., Ozanne, S.E., Koulman, A. (2020). A high-throughput platform for  
649 detailed lipidomic analysis of a range of mouse and human tissues. *Anal. Bioanal. Chem.*  
650 *412(12)*, 2851–2862. doi: 10.1007/s00216-020-02511-0.

651 Furse, S., Koulman, A. (2019). The Lipid and Glyceride Profiles of Infant Formula Differ by  
652 Manufacturer, Region and Date Sold. *Nutrients* *11(5)*, 1122. doi: 10.3390/nu11051122.

653 Furse, S., Watkins, A., Hojat, N., Smith, J., Williams, H., Chiarugi, D., & Koulman, A. (2021).  
654 Lipid traffic analysis reveals the impact of high paternal carbohydrate intake on offsprings'  
655 lipid metabolism. *Comms Biol.*, *4*, 163. doi: 10.1038/s42003-021-01686-1.

656 GBD 2017 Causes of Death Collaborators (2018). Global, Regional, and National Age-Sex-  
657 Specific Mortality for 282 Causes of Death in 195 Countries and Territories, 1980-2017: A  
658 Systematic Analysis for the Global Burden of Disease Study 2017. *Lancet* *392(10159)*, 1736-  
659 1788. doi: 10.1016/S0140-6736(18)32203-7.

660 Guénard, F., Deshaies, Y., Cianflone, K., Kral, J.G., Marceau, P., Vohl, M.C (2013).  
661 Differential methylation in glucoregulatory genes of offspring born before vs. after maternal  
662 gastrointestinal bypass surgery. *Proc. Natl. Acad. Sci* *110(28)*, 11439-44. doi:  
663 10.1073/pnas.1216959110.

- 664 Halade, G., Dorbane, A., Ingle, K., Kain, V., Schmitter, J. and Rhourri-Frih, B. (2018).  
665 Comprehensive targeted and non-targeted lipidomics analyses in failing and non-failing heart.  
666 *Anal Bioanal Chem* *410*(7), 1965–1976. doi: 10.1007/s00216-018-0863-7.
- 667 Hamilton, R. and Fielding, P. (1989). Nascent very low density lipoproteins from rat  
668 hepatocytic Golgi fractions are enriched in phosphatidylethanolamine. *Biochem. Biophys. Res.*  
669 *Comm* *160*(1), 162–167. 10.1016/0006-291x(89)91635-5.
- 670 Harshfield, E.L., Koulman, A., Ziemek, D., Marney, L., Fauman, E.B., Paul, D.S., Stacey, D.,  
671 Rasheed, A., Lee, J.J., Shah, N., Jabeen, S., Imran, A., Abbas, S., Hina, Z., Qamar, N., Mallick,  
672 N.H., Yaqoob, Z., Saghir, T., Rizvi, S.N.H., Memon, A., Rasheed, S.Z., Memon, F.U., Qureshi,  
673 I.H., Ishaq, M., Frossard, P., Danesh, J., Saleheen, D., Butterworth, A.S., Wood, A.M., Griffin,  
674 J.L. (2019). An Unbiased Lipid Phenotyping Approach To Study the Genetic Determinants of  
675 Lipids and Their Association with Coronary Heart Disease Risk Factors. *J. Proteome Res.*  
676 *18*(6), 2397-2410. doi: 10.1021/acs.jproteome.8b00786.
- 677 Helle, E. and Priest, J. (2020). Maternal Obesity and Diabetes Mellitus as Risk Factors for  
678 Congenital Heart Disease in the Offspring. *J. Am. Heart Assoc.* *9*(8). doi:  
679 10.1161/JAHA.119.011541.
- 680 Herrera, E., Desoye, G. (2016). Maternal and fetal lipid metabolism under normal and  
681 gestational diabetic conditions. *Horm. Mol. Biol. Clin. Investig.* *26*(2), 109–27. doi:  
682 10.1515/hmbci-2015-0025.
- 683 Howell, K. R. and Powell, T. L. (2017). Effects of maternal obesity on placental function and  
684 fetal development. *Reproduction* (Cambridge, England), *153*(3), R97–R108. doi:  
685 10.1530/REP-16-0495.



- 686 Kuklennyik, Z., Jones, J., Gardner, M., Schieltz, D., Parks, B., Toth, C., Rees, J., Andrews, M.,  
687 Carter, K., Lehtikoski, A., McWilliams, L., Williamson, Y., Bierbaum, K., Pirkle, J. and Barr,  
688 J. (2018). Core lipid, surface lipid and apolipoprotein composition analysis of lipoprotein  
689 particles as a function of particle size in one workflow integrating asymmetric flow field-flow  
690 fractionation and liquid chromatography-tandem mass spectrometry. *PLOS ONE* *13*(4),  
691 e0194797. doi: 10.1371/journal.pone.0194797. eCollection 2018.
- 692 Le, C.H., Mulligan, C.M., Routh, M.A., Bouma, G.J., Frye, M.A., Jeckel, K.M., Sparagna,  
693 G.C., Lynch, J.M., Moore, R.L., McCune, S.A., et al. (2014). Delta-6-desaturase links  
694 polyunsaturated fatty acid metabolism with phospholipid remodeling and disease progression  
695 in heart failure. *Circ. Heart Fail.* *7*, 172–183. doi:  
696 10.1161/CIRCHEARTFAILURE.113.000744.
- 697 Loche, E., Blackmore, H., Carpenter, A., Beeson, J., Pinnock, A., Ashmore, T., Aiken, C., de  
698 Almeida-Faria, J., Schoonejans, J., Giussani, D., Fernandez-Twinn, D. and Ozanne, S. (2018).  
699 Maternal diet-induced obesity programmes cardiac dysfunction in male mice independently of  
700 post-weaning diet. *Cardiovasc. Res.* *114*(10), 1372–1384. doi: 10.1093/cvr/cvy082.
- 701 Lopaschuk, G. and Jaswal, J. (2010). Energy Metabolic Phenotype of the Cardiomyocyte  
702 During Development, Differentiation, and Postnatal Maturation. *J. Cardiovasc. Pharmacol.*  
703 *56*(2), 130–140. doi: 10.1097/FJC.0b013e3181e74a14.
- 704 Miranda, J., Simões, R., Paules, C., Cañueto, D., Pardo-Cea, M., García-Martín, M., Crovetto,  
705 F., Fuertes-Martin, R., Domenech, M., Gómez-Roig, M., Eixarch, E., Estruch, R., Hansson, S.,  
706 Amigó, N., Cañellas, N., Crispi, F. and Gratacós, E. (2018). Metabolic profiling and targeted  
707 lipidomics reveals a disturbed lipid profile in mothers and fetuses with intrauterine growth  
708 restriction. *Sci. Rep.* *8*(1), 13614. doi: 10.1038/s41598-018-31832-5.

- 709 Molenaar, M.R., Jeucken, A., Wassenaar, T.A., van de Lest, C.H.A., Brouwers, J.F., Helms,  
710 J.B. (2019). LION/web: a web-based ontology enrichment tool for lipidomic data analysis.  
711 *Gigascience* 8(6), giz061. doi: 10.1093/gigascience/giz061.
- 712 Nelson, P.R.C., Taylor, P.A., MacGregor, J.F. (1996). Missing data methods in PCA and PLS:  
713 Score calculations with incomplete observations. *Chemometr Intell Lab Syst.* 35(1), 45–65.  
714 DOI:10.1016/S0169-7439(96)00007-X.
- 715 Nicholas, L. M., Nagao, M., Kusinski, L. C., Fernandez-Twinn, D. S., Eliasson, L., & Ozanne,  
716 S. E. (2020). Exposure to maternal obesity programs sex differences in pancreatic islets of the  
717 offspring in mice. *Diabetologia*, 63(2), 324–337. doi: 10.1007/s00125-019-05037-y.
- 718 NMPA Project Team (2019). National Maternity and Perinatal Audit: Clinical Report 2019.  
719 Based on births in NHS maternity services between 1 April 2016 and 31 March 2017 (London:  
720 RCOG).
- 721 Patterson, A.J., and Zhang, L. (2010). Hypoxia and fetal heart development. *Curr. Mol. Med*  
722 *10*, 653–666.
- 723 Piquereau, J. and Ventura-Clapier, R. (2018). Maturation of Cardiac Energy Metabolism  
724 During Perinatal Development. *Front. Physiol* 9.
- 725 Su, X., Han, X., Mancuso, D., Abendschein, D. and Gross, R. (2005). Accumulation of Long-  
726 Chain Acylcarnitine and 3-Hydroxy Acylcarnitine Molecular Species in Diabetic Myocardium:  
727 Identification of Alterations in Mitochondrial Fatty Acid Processing in Diabetic Myocardium  
728 by Shotgun Lipidomics. *Biochemistry* 44(13), 5234–5245. doi: 10.1021/bi047773a.

- 729 Sud, M., Fahy, E., Cotter, D., Brown, A., Dennis, E.A., Glass, C.K., Merrill, A.H. Jr, Murphy,  
730 R.C., Raetz, C.R., Russell, D.W., Subramaniam, S. (2007). LMSD: LIPID MAPS structure  
731 database. *Nucleic Acids Res.* 35, D527–32. doi: 10.1093/nar/gkl838.
- 732 Tham, Y., Bernardo, B., Huynh, K., Ooi, J., Gao, X., Kiriazis, H., Giles, C., Meikle, P. and  
733 McMullen, J. (2018). Lipidomic Profiles of the Heart and Circulation in Response to Exercise  
734 versus Cardiac Pathology: A Resource of Potential Biomarkers and Drug Targets. *Cell Rep.*  
735 24(10), 2757–2772.
- 736 van der Veen, J., Kennelly, J., Wan, S., Vance, J., Vance, D. and Jacobs, R. (2017). The critical  
737 role of phosphatidylcholine and phosphatidylethanolamine metabolism in health and disease.  
738 *Biochim. Biophys. Acta* 1859(9), 1558–1572. doi: 10.1016/j.celrep.2018.08.017.
- 739 Ventura, F., Ijlst, L., Ruiten, J., Ofman, R., Costa, C., Jakobs, C., Duran, M., De Almeida, I.,  
740 Bieber, L. and Wanders, R. (1998). Carnitine palmitoyltransferase II specificity towards beta-  
741 oxidation intermediates. Evidence for a reverse carnitine cycle in mitochondria. *Eur. J. Biochem*  
742 253(3), 614–618. doi: 10.1046/j.1432-1327.1998.2530614.x.
- 743 Wallace, J., Bellissimo, C., Yeo, E., Fei Xia, Y., Petrik, J., Surette, M., Bowdish, D. and  
744 Sloboda, D. (2019). Obesity during pregnancy results in maternal intestinal inflammation,  
745 placental hypoxia, and alters fetal glucose metabolism at mid-gestation. *Sci. Rep.* 9(1). doi:  
746 10.1038/s41598-019-54098-x.
- 747 Zambrano, E., Nathanielsz, P.W. (2013). Mechanisms by which maternal obesity programs  
748 offspring for obesity: evidence from animal studies. *Nutr. Rev. Suppl* 1, S42–54. doi:  
749 10.1111/nure.12068.
- 750 Zhu, Y., Li, M., Rahman, M., Hinkle, S., Wu, J., Weir, N., Lin, Y., Yang, H., Tsai, M., Ferrara,  
751 A. and Zhang, C. (2019). Plasma phospholipid n-3 and n-6 polyunsaturated fatty acids in

752 relation to cardiometabolic markers and gestational diabetes: A longitudinal study within the  
753 prospective. *PloS Med.* *16(9)*, e1002910. doi: 10.1371/journal.pmed.1002910.
